# Supplementary material for: The structural, phonon and optical properties of [CH3NH3]M0.5CrxAl0.5−x(HCOO)3 (M = Na, K; x = 0, 0.025, 0.5) metal–organic framework perovskites for luminescence thermometry
Source: Royal Society of Chemistry journal article supplement (doi:10.1039/c9cp01043b), 2019-01-01
Supplement: c9cp01043b1.pdf [file c9cp01043b1.pdf]

## Structural, phonon and optical properties of [CH<sub>3</sub>NH<sub>3</sub>]<sub>0.5</sub>Cr<sub>x</sub>Al<sub>0.5-x</sub>(HCOO)<sub>3</sub> (M=Na, K; x=0, 0.025, 0.5) metal-organic framework perovskites for luminescence thermometry

by *Maciej Ptak,<sup>a</sup> Błażej Dziuk,<sup>b</sup> Dagmara Stefańska and Krzysztof Hermanowicza*

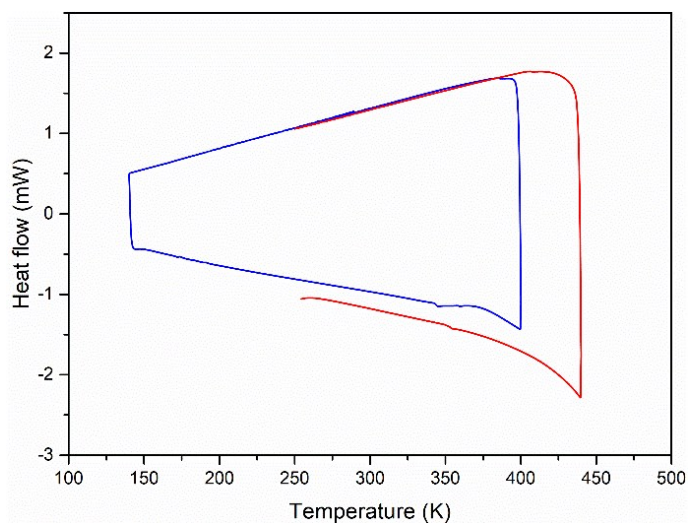

Fig. S1. The DSC traces for the MeANaCr crystals measured in the 140–300 K (blue line) and 250–440 K (red line) ranges at a rate of 5 °C min<sup>-1</sup> under a nitrogen atmosphere.

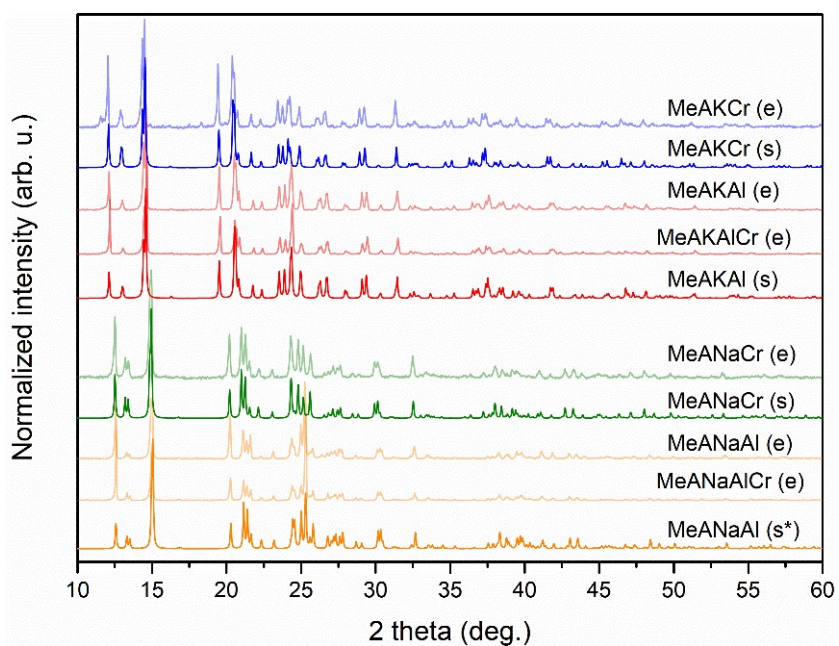

Fig. S2. Experimental (e) and simulated (s) powder XRD based on the single-crystal data for all studied perovskites. The simulated pattern for MeANaAl (s\*) is taken from literature.<sup>1</sup>

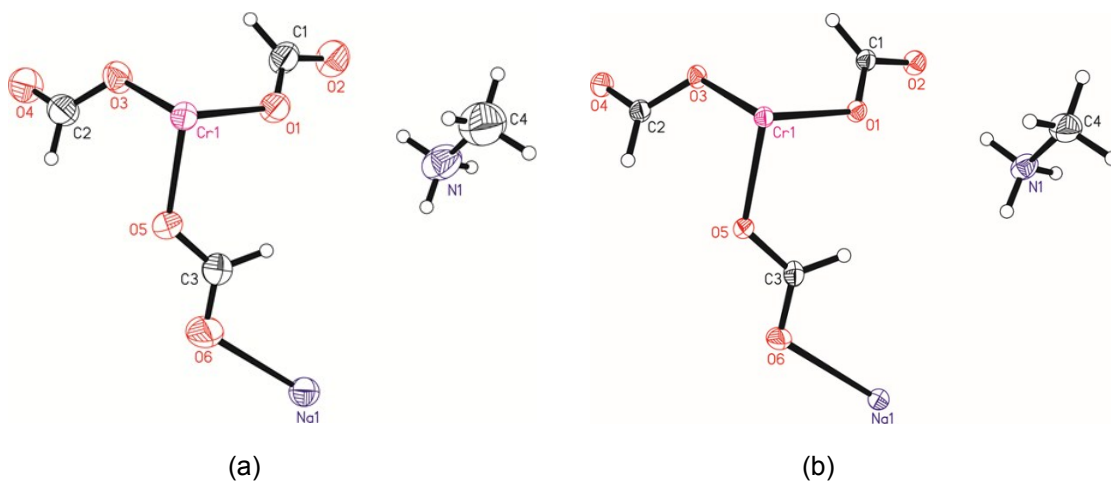

Fig. S3. Asymmetric part of unit cell for MeANaCr at (a) 295 K and (b) 100 K. Displacement ellipsoids are drawn at the 50% probability level.

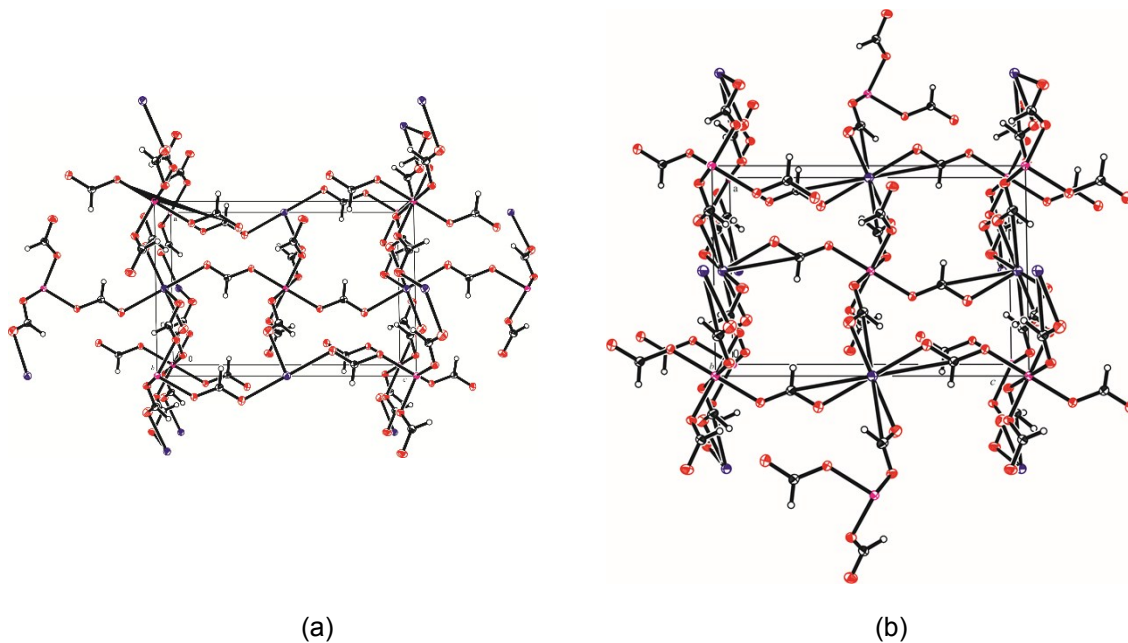

Fig. S4. Packing diagrams for MeANaCr at (a) 295 K and (b) 100 K. Displacement ellipsoids are drawn at the 50% probability level.

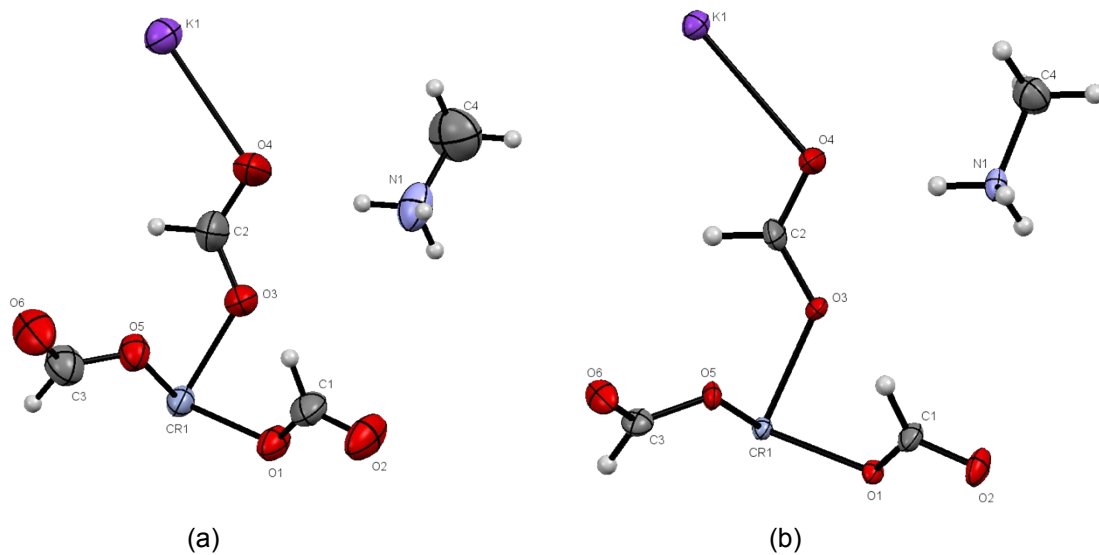

Fig. S5. Asymmetric part of unit cell for MeAKCr at (a) 293 K and (b) 100 K. Displacement ellipsoids are drawn at the 50% probability level.

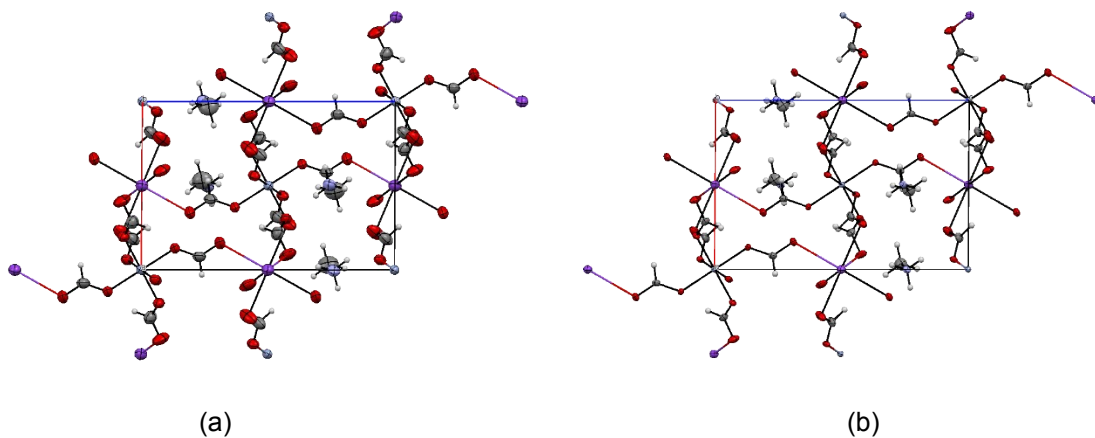

Fig. S6. Packing diagrams for MeAKCr at (a) 293 K and (b) 100 K. Displacement ellipsoids are drawn at the 50% probability level.

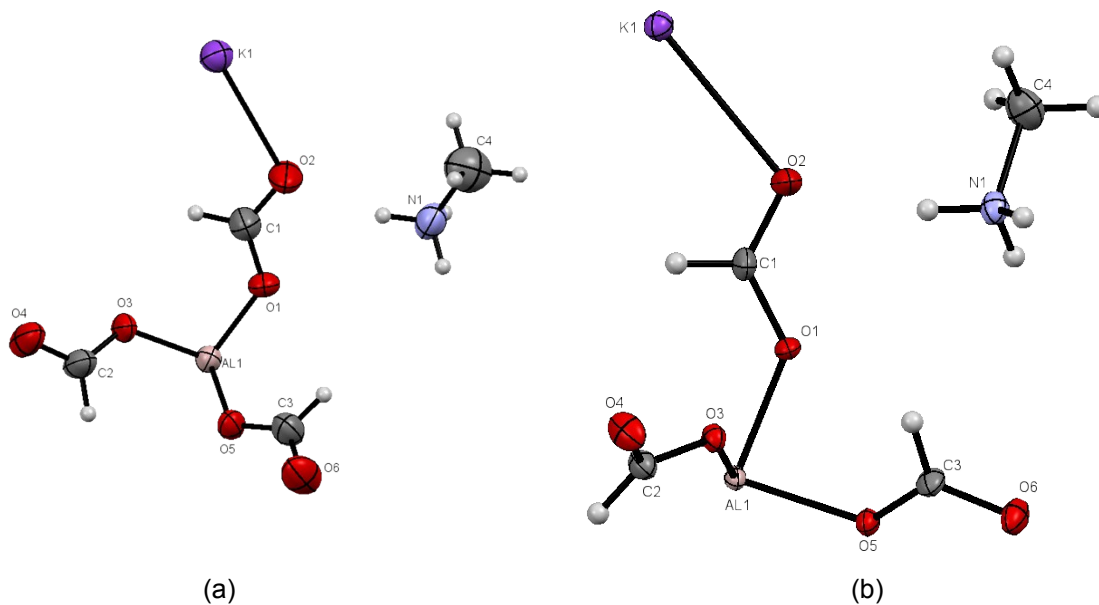

Fig. S7. Asymmetric part of unit cell for MeAKAI at (a) 293 K and (b) 100 K. Displacement ellipsoids are drawn at the 50% probability level.

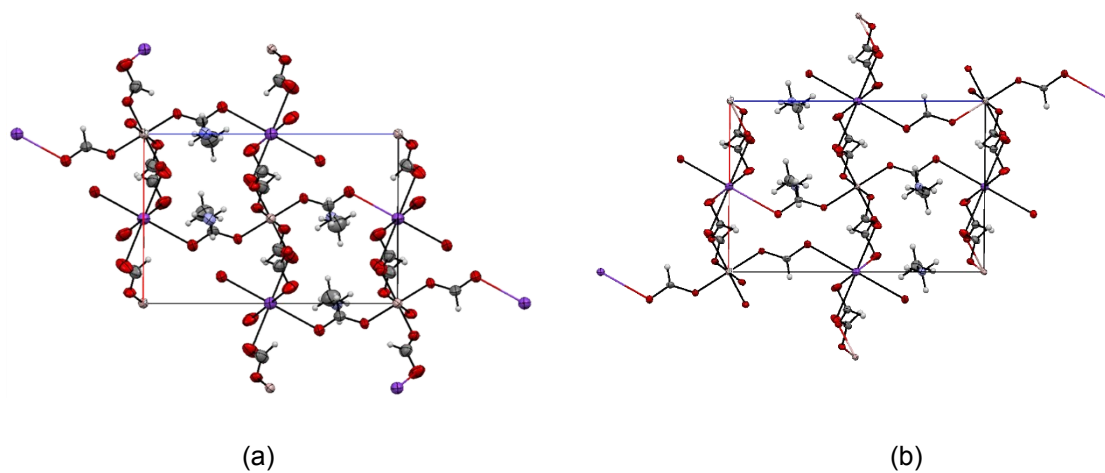

Fig. S8. Packing diagrams for MeAKAI at (a) 293 K and (b) 100 K. Displacement ellipsoids are drawn at the 50% probability level.

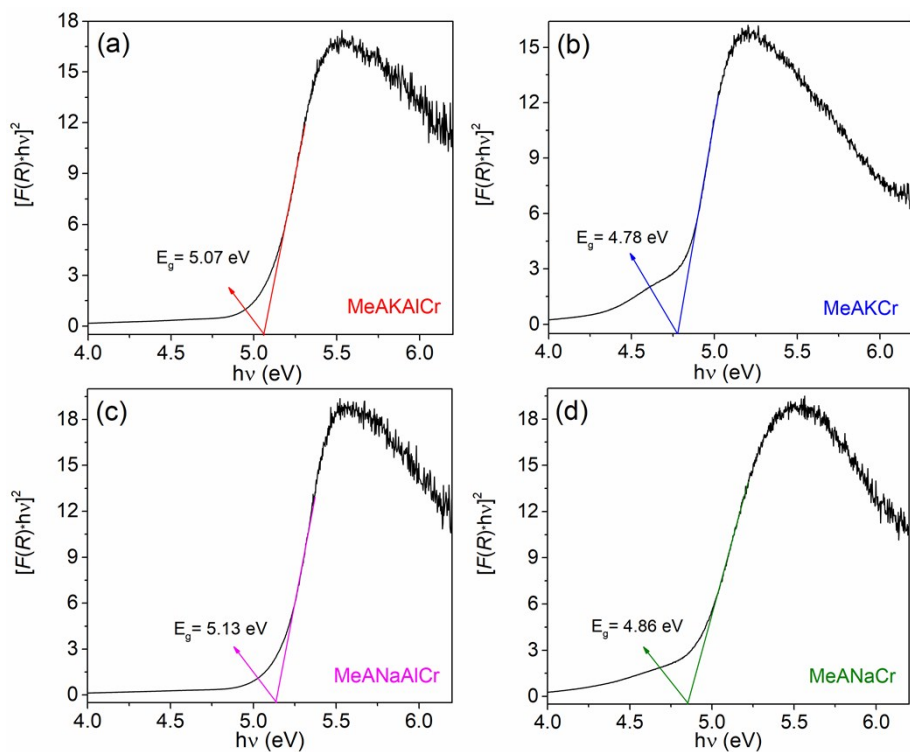

Fig. S9. The energy of band gaps for investigated compounds determined using Kubelka-Munk function.

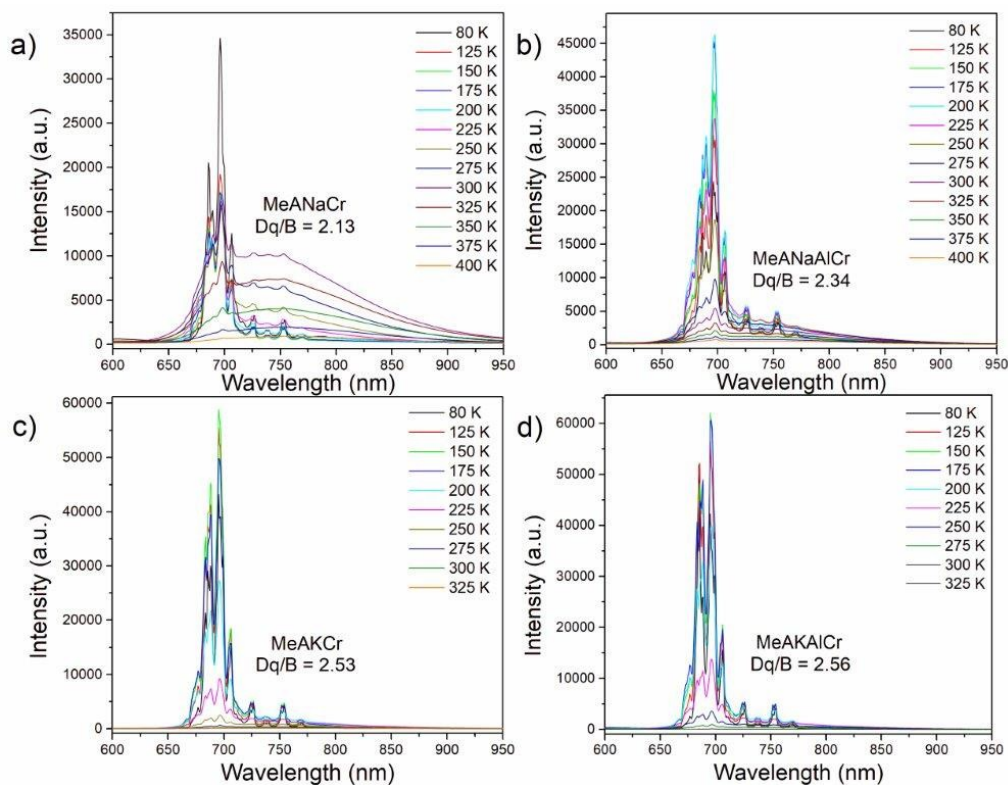

Fig. S10. The temperature-dependent emission spectra of (a) MeANaCr, (b) MeANaAlCr, (c) MeAKCr and (d) MeAKAlCr recorded under 450 nm excitation line in the range of 77 to 400 K.

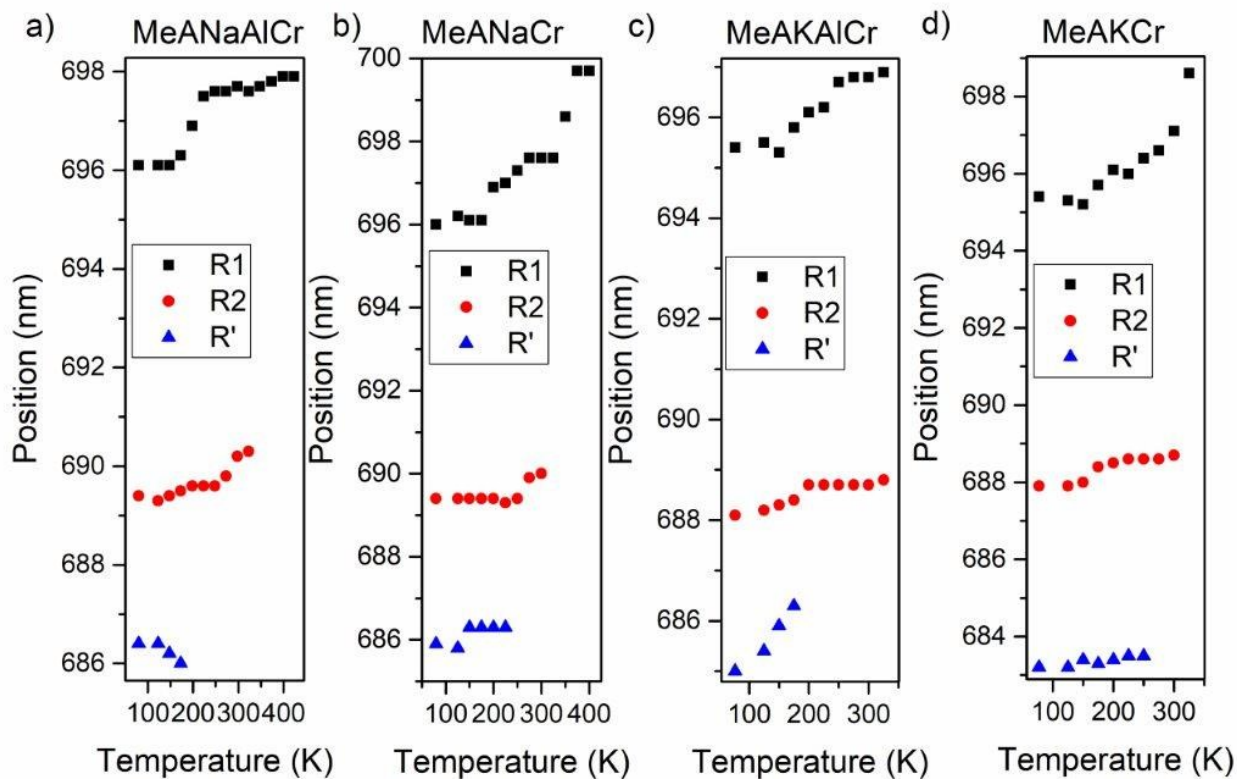

Fig. S11. The temperature dependents of R-lines positions in investigated compounds.

Tab. S1. Crystallographic details of MeANaCr, MeAKCr and MeAKAl at room-temperature and 100 K.

| Crystal data                                                               | MeANaCr                                                                |                                          | MeAKAl                                                |                                        | MeAKCr                                                |                                        |
|----------------------------------------------------------------------------|------------------------------------------------------------------------|------------------------------------------|-------------------------------------------------------|----------------------------------------|-------------------------------------------------------|----------------------------------------|
| Chemical formula                                                           | $(\text{CH}_3\text{NH}_3)_2\text{NaCr}(\text{HCOO})_6$                 |                                          | $(\text{CH}_3\text{NH}_3)_2\text{KAl}(\text{HCOO})_6$ |                                        | $(\text{CH}_3\text{NH}_3)_2\text{KCr}(\text{HCOO})_6$ |                                        |
| <i>M</i>                                                                   | 409.23                                                                 |                                          | 400.32                                                |                                        | 425.34                                                |                                        |
| Crystal system, sg                                                         | Monoclinic, $P2_1/n$                                                   |                                          | Monoclinic, $P2_1/n$                                  |                                        | Monoclinic, $P2_1/n$                                  |                                        |
| Temperature (K)                                                            | 295(2)                                                                 | 100.0(1)                                 | 293(2)                                                | 100.0(1)                               | 293(2)                                                | 100.0(1)                               |
| <i>a</i> , <i>b</i> , <i>c</i> (Å)                                         | 8.0317(4),<br>8.7854(5),<br>11.9391(7)                                 | 7.9504(9),<br>8.7582(10),<br>11.8530(14) | 8.1644(8),<br>9.0972(10),<br>12.2715(13)              | 8.1568(4),<br>9.0289(4),<br>12.2380(6) | 8.2054(9),<br>9.1089(13),<br>12.3423(15)              | 8.1907(5),<br>9.0549(7),<br>12.2909(8) |
| $\alpha$ , $\beta$ , $\gamma$ (°)                                          | 90.000(0),<br>90.923(5),<br>90.000(0)                                  | 90.000,<br>90.989(10),<br>90.000         | 90.000(0),<br>90.289(10),<br>90.000(0)                | 90.000,<br>90.509(4),<br>90.000        | 90.000,<br>90.377(10),<br>90.000                      | 90.000,<br>90.410(6),<br>90.000        |
| <i>V</i> (Å <sup>3</sup> )                                                 | 842.33(8) 825.22(16)                                                   |                                          | 911.43(17) 901.26(7)                                  |                                        | 922.5(2) 911.54(11)                                   |                                        |
| <i>Z</i>                                                                   | 2                                                                      |                                          | 2                                                     |                                        | 2                                                     |                                        |
| Radiation type                                                             | MoK $\alpha$                                                           |                                          | MoK $\alpha$                                          |                                        | MoK $\alpha$                                          |                                        |
| $\mu$ (mm <sup>-1</sup> )                                                  | 0.77                                                                   | 0.78                                     | 0.40                                                  | 0.40                                   | 0.90                                                  | 0.91                                   |
| Crystal size (mm)                                                          | 0.20 × 0.20 × 0.10                                                     |                                          | 0.20 × 0.20 × 0.10                                    |                                        | 0.20 × 0.20 × 0.10                                    |                                        |
| Data collection                                                            |                                                                        |                                          |                                                       |                                        |                                                       |                                        |
| No. of measured, independent and observed [ $I > 2\sigma(I)$ ] reflections | 5502,<br>1629, 1056                                                    | 5450, 1614,<br>1066                      | 5975, 1773,<br>720                                    | 5822,<br>1741, 1234                    | 5947, 1798,<br>922                                    | 5936,<br>1779, 992                     |
| $R_{int}$ ( $\sin\theta/\lambda_{max}$ (Å <sup>-1</sup> ))                 | 0.043                                                                  | 0.051                                    | 0.144                                                 | 0.048                                  | 0.098                                                 | 0.083                                  |
|                                                                            | 0.617                                                                  |                                          | 0.616                                                 |                                        | 0.617                                                 |                                        |
| Refinement                                                                 |                                                                        |                                          |                                                       |                                        |                                                       |                                        |
| $R[F^2 > 2\sigma(F^2)]$ , $wR(F^2)$ , <i>S</i>                             | 0.033,<br>0.065, 0.86                                                  | 0.033,<br>0.068, 0.86                    | 0.061,<br>0.153, 0.91                                 | 0.037,<br>0.083, 0.87                  | 0.065,<br>0.131, 1.11                                 | 0.044,<br>0.086, 0.97                  |
| No. of reflections                                                         | 1629                                                                   |                                          | 1773                                                  |                                        | 1798                                                  |                                        |
| No. of parameters                                                          | 114                                                                    |                                          | 114                                                   |                                        | 114                                                   |                                        |
| H-atom treatment                                                           | H atoms treated by a mixture of independent and constrained refinement |                                          |                                                       |                                        |                                                       |                                        |
| $\Delta\rho_{max}, \Delta\rho_{min}$ (eÅ <sup>-3</sup> )                   | 0.18, -0.27                                                            | 0.28, -0.40                              | 0.31, -0.28                                           | 0.33, -0.31                            | 0.35, -0.45                                           | 0.35, -0.52                            |

 Tab. S2. The parameters of selected HBs created between the MeA<sup>+</sup> cation and metal-formate framework for studied MOFs at room temperature and at 100 K (in square brackets). Data for MeANaAl are taken from literature<sup>1</sup> and refer to single crystal data at room temperature and at 180 K (at square brackets).

|                  | <i>D</i> —H $\cdots$ <i>A</i>    | <i>D</i> —H (Å) | H $\cdots$ <i>A</i> (Å) | <i>D</i> $\cdots$ <i>A</i> (Å) | <i>D</i> —H $\cdots$ <i>A</i> (°) |
|------------------|----------------------------------|-----------------|-------------------------|--------------------------------|-----------------------------------|
| MeANaCr          |                                  |                 |                         |                                |                                   |
|                  | N1—H1A $\cdots$ O2               | 0.89 [0.89]     | 2.00 [1.96]             | 2.862(3) [2.832(3)]            | 164.2 [165.4]                     |
| NaO <sub>6</sub> | N1—H1B $\cdots$ O4 <sup>i</sup>  | 0.89 [0.89]     | 1.99 [1.99]             | 2.875(3) [2.877(3)]            | 173.6 [172.2]                     |
|                  | N1—H1C $\cdots$ O6 <sup>ii</sup> | 0.89 [0.89]     | 2.09 [2.01]             | 2.940(3) [2.884(3)]            | 160.3 [165.7]                     |
| CrO <sub>6</sub> | N1—H1C $\cdots$ O5 <sup>ii</sup> | 0.89 [0.89]     | 2.36 [2.41]             | 3.097(3) [3.104(3)]            | 140.7 [135.5]                     |
| MeAKCr           |                                  |                 |                         |                                |                                   |

|                     |                           |             |             |                         |               |
|---------------------|---------------------------|-------------|-------------|-------------------------|---------------|
| KO <sub>6</sub>     | N1—H1B···O2 <sup>ii</sup> | 0.89 [0.89] | 1.95 [1.95] | 2.828(6) [2.821(4)]     | 167.1 [167.3] |
|                     | N1—H1A···O6 <sup>i</sup>  | 0.89 [0.89] | 1.95 [1.94] | 2.832(6) [2.833(4)]     | 172.2 [176.9] |
|                     | N1—H1C···O4               | 0.89 [0.89] | 1.95 [1.92] | 2.820(5) [2.795(4)]     | 166.8 [166.5] |
| CrO <sub>6</sub>    | N1—H1C···O3               | 0.89 (0.89) | 2.57 [2.58] | 3.273(6) [3.283(4)]     | 136.9 [136.1] |
| MeNaAl <sup>1</sup> |                           |             |             |                         |               |
| NaO <sub>6</sub>    | N1—H6···O2                | 0.91 [0.89] | 1.99 [1.96] | 2.8577(16) [2.8454(17)] | 163.0 [163.5] |
|                     | N1—H4···O5                | 0.91 [0.89] | 1.97 [1.95] | 2.8544(16) [2.8520(19)] | 174.5 [174.5] |
|                     | N1—H5···O4                | 0.91 [0.89] | 2.04 [1.99] | 2.9035(17) [2.8748(18)] | 161.7 [163.9] |
| AlO <sub>6</sub>    | N1—H5···O3                | 0.91 [0.89] | 2.42 [2.42] | 3.1444(16) [3.1453(18)] | 139.3 [136.7] |
| MeAKAl              |                           |             |             |                         |               |
| KO <sub>6</sub>     | N1—H1B···O6 <sup>v</sup>  | 0.89 [0.89] | 1.96 [1.95] | 2.832(6) [2.822(3)]     | 166.4 [167.5] |
|                     | N1—H1A···O4 <sup>iv</sup> | 0.89 [0.89] | 1.93 [1.93] | 2.823(6) [2.822(3)]     | 175.9 [175.3] |
|                     | N1—H1C···O2               | 0.89 [0.89] | 1.94 [1.93] | 2.810(6) [2.801(3)]     | 165.2 [167.2] |
| AlO <sub>6</sub>    | N1—H1B···O1               | 0.89 [0.89] | 2.61 [2.63] | 3.331(6) [3.342(3)]     | 138.7 [137.2] |

Symmetry code(s): (i)  $-x+1, -y+1, -z+1$ ; (ii)  $-x+2, -y, -z+1$ ; (iv)  $-x+3/2, y-1/2, -z+1/2$ ; (v)  $-x+1, -y, -z+1$ .

Tab. S3. Selected geometric parameters (Å, °) for MeANaCr at 295 and 100 K.

295 K

|                                         |             |                                         |             |
|-----------------------------------------|-------------|-----------------------------------------|-------------|
| Cr1—O5                                  | 1.9695 (15) | Na1—O2 <sup>iii</sup>                   | 2.4162 (17) |
| Cr1—O5 <sup>i</sup>                     | 1.9695 (15) | Na1—O2 <sup>iv</sup>                    | 2.4162 (17) |
| Cr1—O3 <sup>i</sup>                     | 1.9738 (16) | Na1—O4 <sup>v</sup>                     | 2.4614 (17) |
| Cr1—O3                                  | 1.9738 (16) | Na1—O4 <sup>vi</sup>                    | 2.4614 (17) |
| Cr1—O1 <sup>i</sup>                     | 1.9740 (16) | C3—O6                                   | 1.209 (3)   |
| Cr1—O1                                  | 1.9740 (16) | C3—O5                                   | 1.263 (3)   |
| O1—C1                                   | 1.261 (3)   | C3—H3                                   | 0.9300      |
| N1—C4                                   | 1.452 (4)   | O3—C2                                   | 1.254 (3)   |
| N1—H1A                                  | 0.8900      | C2—O4                                   | 1.227 (3)   |
| N1—H1B                                  | 0.8900      | C2—H2                                   | 0.9300      |
| N1—H1C                                  | 0.8900      | O2—Na1 <sup>vii</sup>                   | 2.4162 (17) |
| C1—O2                                   | 1.226 (3)   | O4—Na1 <sup>viii</sup>                  | 2.4614 (17) |
| C1—H1                                   | 0.9300      | C4—H4A                                  | 0.9600      |
| Na1—O6 <sup>i</sup>                     | 2.3944 (17) | C4—H4B                                  | 0.9600      |
| Na1—O6                                  | 2.3944 (17) | C4—H4C                                  | 0.9600      |
| O5—Cr1—O5 <sup>i</sup>                  | 180.0       | O6—Na1—O2 <sup>iv</sup>                 | 87.39 (6)   |
| O5—Cr1—O3 <sup>i</sup>                  | 88.63 (6)   | O2 <sup>iii</sup> —Na1—O2 <sup>iv</sup> | 180.0       |
| O5 <sup>i</sup> —Cr1—O3 <sup>i</sup>    | 91.37 (6)   | O6 <sup>ii</sup> —Na1—O4 <sup>v</sup>   | 91.63 (6)   |
| O5—Cr1—O3                               | 91.37 (6)   | O6—Na1—O4 <sup>v</sup>                  | 88.37 (6)   |
| O5 <sup>i</sup> —Cr1—O3                 | 88.63 (6)   | O2 <sup>iii</sup> —Na1—O4 <sup>v</sup>  | 86.73 (6)   |
| O3 <sup>i</sup> —Cr1—O3                 | 180.0       | O2 <sup>iv</sup> —Na1—O4 <sup>v</sup>   | 93.27 (6)   |
| O5—Cr1—O1 <sup>i</sup>                  | 88.91 (6)   | O6 <sup>ii</sup> —Na1—O4 <sup>vi</sup>  | 88.37 (6)   |
| O5 <sup>i</sup> —Cr1—O1 <sup>i</sup>    | 91.09 (6)   | O6—Na1—O4 <sup>vi</sup>                 | 91.63 (6)   |
| O3 <sup>i</sup> —Cr1—O1 <sup>i</sup>    | 90.93 (7)   | O2 <sup>iii</sup> —Na1—O4 <sup>vi</sup> | 93.26 (6)   |
| O3—Cr1—O1 <sup>i</sup>                  | 89.07 (7)   | O2 <sup>iv</sup> —Na1—O4 <sup>vi</sup>  | 86.74 (6)   |
| O5—Cr1—O1                               | 91.09 (6)   | O4 <sup>v</sup> —Na1—O4 <sup>vi</sup>   | 180.0       |
| O5 <sup>i</sup> —Cr1—O1                 | 88.91 (6)   | O6—C3—O5                                | 125.1 (3)   |
| O3 <sup>i</sup> —Cr1—O1                 | 89.07 (7)   | O6—C3—H3                                | 117.5       |
| O3—Cr1—O1                               | 90.93 (7)   | O5—C3—H3                                | 117.5       |
| O1 <sup>i</sup> —Cr1—O1                 | 180.0       | C2—O3—Cr1                               | 126.70 (17) |
| C1—O1—Cr1                               | 126.74 (16) | O4—C2—O3                                | 126.2 (3)   |
| C4—N1—H1A                               | 109.5       | O4—C2—H2                                | 116.9       |
| C4—N1—H1B                               | 109.5       | O3—C2—H2                                | 116.9       |
| H1A—N1—H1B                              | 109.5       | C1—O2—Na1 <sup>vii</sup>                | 116.46 (16) |
| C4—N1—H1C                               | 109.5       | C2—O4—Na1 <sup>viii</sup>               | 114.86 (18) |
| H1A—N1—H1C                              | 109.5       | N1—C4—H4A                               | 109.5       |
| H1B—N1—H1C                              | 109.5       | N1—C4—H4B                               | 109.5       |
| O2—C1—O1                                | 124.6 (2)   | H4A—C4—H4B                              | 109.5       |
| O2—C1—H1                                | 117.7       | N1—C4—H4C                               | 109.5       |
| O1—C1—H1                                | 117.7       | H4A—C4—H4C                              | 109.5       |
| O6 <sup>ii</sup> —Na1—O6                | 180.0       | H4B—C4—H4C                              | 109.5       |
| O6 <sup>ii</sup> —Na1—O2 <sup>iii</sup> | 87.39 (6)   | C3—O6—Na1                               | 116.73 (18) |
| O6—Na1—O2 <sup>iii</sup>                | 92.61 (6)   | C3—O5—Cr1                               | 127.66 (17) |



|                                        |              |                              |           |
|----------------------------------------|--------------|------------------------------|-----------|
| O6 <sup>ii</sup> —Na1—O2 <sup>iv</sup> | 92.61 (6)    |                              |           |
| Cr1—O1—C1—O2                           | -176.10 (19) | O3—C2—O4—Na1 <sup>viii</sup> | 170.6 (2) |
| Cr1—O3—C2—O4                           | 176.1 (2)    | O5—C3—O6—Na1                 | 179.7 (2) |
| O1—C1—O2—Na1 <sup>vii</sup>            | 179.82 (19)  | O6—C3—O5—Cr1                 | 176.2 (2) |

Symmetry code(s): (i) -x+1, -y+1, -z+1; (ii) -x+2, -y, -z+1; (iii) x+1/2, -y+1/2, z+1/2; (iv) -x+3/2, y-1/2, -z+1/2; (v) -x+1, -y, -z+1; (vi) x+1, y, z; (vii) -x+3/2, y+1/2, -z+1/2; (viii) x-1, y, z.

### 100 K

|                                          |             |                                          |              |
|------------------------------------------|-------------|------------------------------------------|--------------|
| Cr1—O5 <sup>i</sup>                      | 1.9708 (17) | Na1—O4 <sup>vi</sup>                     | 2.4469 (18)  |
| Cr1—O5                                   | 1.9708 (17) | Na1—O4 <sup>vii</sup>                    | 2.4469 (18)  |
| Cr1—O3                                   | 1.9743 (17) | Na1—C3                                   | 3.099 (3)    |
| Cr1—O3 <sup>i</sup>                      | 1.9743 (17) | Na1—C3 <sup>iii</sup>                    | 3.099 (3)    |
| Cr1—O1                                   | 1.9770 (17) | Na1—C1 <sup>v</sup>                      | 3.126 (3)    |
| Cr1—O1 <sup>i</sup>                      | 1.9770 (17) | Na1—C1 <sup>iv</sup>                     | 3.126 (3)    |
| O1—C1                                    | 1.270 (3)   | C3—O6                                    | 1.223 (3)    |
| N1—C4                                    | 1.467 (3)   | C3—O5                                    | 1.265 (3)    |
| N1—H1A                                   | 0.8900      | C3—H3                                    | 0.9300       |
| N1—H1B                                   | 0.8900      | O3—C2                                    | 1.272 (3)    |
| N1—H1C                                   | 0.8900      | C2—O4                                    | 1.227 (3)    |
| C1—O2                                    | 1.232 (3)   | C2—H2                                    | 0.9300       |
| C1—Na1 <sup>ii</sup>                     | 3.126 (3)   | O2—Na1 <sup>ii</sup>                     | 2.3925 (18)  |
| C1—H1                                    | 0.9300      | O4—Na1 <sup>viii</sup>                   | 2.4469 (18)  |
| Na1—O6 <sup>iii</sup>                    | 2.3725 (18) | C4—H4A                                   | 0.9600       |
| Na1—O6                                   | 2.3725 (18) | C4—H4B                                   | 0.9600       |
| Na1—O2 <sup>iv</sup>                     | 2.3925 (18) | C4—H4C                                   | 0.9600       |
| Na1—O2 <sup>v</sup>                      | 2.3925 (18) |                                          |              |
| O5 <sup>i</sup> —Cr1—O5                  | 180.0       | O4 <sup>vi</sup> —Na1—C3                 | 107.88 (7)   |
| O5 <sup>i</sup> —Cr1—O3                  | 88.96 (7)   | O4 <sup>vii</sup> —Na1—C3                | 72.12 (7)    |
| O5—Cr1—O3                                | 91.04 (7)   | O6 <sup>iii</sup> —Na1—C3 <sup>iii</sup> | 20.89 (7)    |
| O5 <sup>i</sup> —Cr1—O3 <sup>i</sup>     | 91.04 (7)   | O6—Na1—C3 <sup>iii</sup>                 | 159.11 (7)   |
| O5—Cr1—O3 <sup>i</sup>                   | 88.96 (7)   | O2 <sup>iv</sup> —Na1—C3 <sup>iii</sup>  | 79.17 (7)    |
| O3—Cr1—O3 <sup>i</sup>                   | 180.0       | O2 <sup>v</sup> —Na1—C3 <sup>iii</sup>   | 100.83 (7)   |
| O5 <sup>i</sup> —Cr1—O1                  | 88.81 (7)   | O4 <sup>vi</sup> —Na1—C3 <sup>iii</sup>  | 72.12 (7)    |
| O5—Cr1—O1                                | 91.19 (7)   | O4 <sup>vii</sup> —Na1—C3 <sup>iii</sup> | 107.88 (7)   |
| O3—Cr1—O1                                | 90.94 (7)   | C3—Na1—C3 <sup>iii</sup>                 | 180.0        |
| O3 <sup>i</sup> —Cr1—O1                  | 89.06 (7)   | O6 <sup>iii</sup> —Na1—C1 <sup>v</sup>   | 77.14 (7)    |
| O5 <sup>i</sup> —Cr1—O1 <sup>i</sup>     | 91.19 (7)   | O6—Na1—C1 <sup>v</sup>                   | 102.86 (7)   |
| O5—Cr1—O1 <sup>i</sup>                   | 88.81 (7)   | O2 <sup>iv</sup> —Na1—C1 <sup>v</sup>    | 159.15 (6)   |
| O3—Cr1—O1 <sup>i</sup>                   | 89.06 (7)   | O2 <sup>v</sup> —Na1—C1 <sup>v</sup>     | 20.85 (6)    |
| O3 <sup>i</sup> —Cr1—O1 <sup>i</sup>     | 90.94 (7)   | O4 <sup>vi</sup> —Na1—C1 <sup>v</sup>    | 107.28 (7)   |
| O1—Cr1—O1 <sup>i</sup>                   | 180.0       | O4 <sup>vii</sup> —Na1—C1 <sup>v</sup>   | 72.72 (7)    |
| C1—O1—Cr1                                | 125.60 (17) | C3—Na1—C1 <sup>v</sup>                   | 90.18 (7)    |
| C4—N1—H1A                                | 109.5       | C3 <sup>iii</sup> —Na1—C1 <sup>v</sup>   | 89.82 (7)    |
| C4—N1—H1B                                | 109.5       | O6 <sup>iii</sup> —Na1—C1 <sup>iv</sup>  | 102.86 (7)   |
| H1A—N1—H1B                               | 109.5       | O6—Na1—C1 <sup>iv</sup>                  | 77.14 (7)    |
| C4—N1—H1C                                | 109.5       | O2 <sup>iv</sup> —Na1—C1 <sup>iv</sup>   | 20.85 (6)    |
| H1A—N1—H1C                               | 109.5       | O2 <sup>v</sup> —Na1—C1 <sup>iv</sup>    | 159.15 (6)   |
| H1B—N1—H1C                               | 109.5       | O4 <sup>vi</sup> —Na1—C1 <sup>iv</sup>   | 72.72 (7)    |
| O2—C1—O1                                 | 124.0 (3)   | O4 <sup>vii</sup> —Na1—C1 <sup>iv</sup>  | 107.28 (7)   |
| O2—C1—Na1 <sup>ii</sup>                  | 43.73 (13)  | C3—Na1—C1 <sup>iv</sup>                  | 89.82 (7)    |
| O1—C1—Na1 <sup>iii</sup>                 | 167.69 (19) | C3 <sup>iii</sup> —Na1—C1 <sup>iv</sup>  | 90.18 (7)    |
| O2—C1—H1                                 | 118.0       | C1 <sup>v</sup> —Na1—C1 <sup>iv</sup>    | 180.000 (17) |
| O1—C1—H1                                 | 118.0       | O6—C3—O5                                 | 123.9 (3)    |
| Na1 <sup>ii</sup> —C1—H1                 | 74.3        | O6—C3—Na1                                | 43.78 (13)   |
| O6 <sup>iii</sup> —Na1—O6                | 180.0       | O5—C3—Na1                                | 167.7 (2)    |
| O6 <sup>iii</sup> —Na1—O2 <sup>iv</sup>  | 86.86 (7)   | O6—C3—H3                                 | 118.0        |
| O6—Na1—O2 <sup>iv</sup>                  | 93.14 (7)   | O5—C3—H3                                 | 118.0        |
| O6 <sup>iii</sup> —Na1—O2 <sup>v</sup>   | 93.14 (7)   | Na1—C3—H3                                | 74.3         |
| O6—Na1—O2 <sup>v</sup>                   | 86.86 (7)   | C2—O3—Cr1                                | 125.10 (18)  |
| O2 <sup>iv</sup> —Na1—O2 <sup>v</sup>    | 180.0       | O4—C2—O3                                 | 124.6 (3)    |
| O6 <sup>iii</sup> —Na1—O4 <sup>vi</sup>  | 91.86 (6)   | O4—C2—H2                                 | 117.7        |
| O6—Na1—O4 <sup>vi</sup>                  | 88.14 (6)   | O3—C2—H2                                 | 117.7        |
| O2 <sup>iv</sup> —Na1—O4 <sup>vi</sup>   | 86.28 (6)   | C1—O2—Na1 <sup>ii</sup>                  | 115.42 (17)  |
| O2 <sup>v</sup> —Na1—O4 <sup>vi</sup>    | 93.72 (6)   | C2—O4—Na1 <sup>viii</sup>                | 113.48 (18)  |
| O6 <sup>iii</sup> —Na1—O4 <sup>vii</sup> | 88.14 (6)   | N1—C4—H4A                                | 109.5        |
| O6—Na1—O4 <sup>vii</sup>                 | 91.86 (6)   | N1—C4—H4B                                | 109.5        |
| O2 <sup>iv</sup> —Na1—O4 <sup>vii</sup>  | 93.72 (6)   | H4A—C4—H4B                               | 109.5        |
| O2 <sup>v</sup> —Na1—O4 <sup>vii</sup>   | 86.28 (6)   | N1—C4—H4C                                | 109.5        |
| O4 <sup>vi</sup> —Na1—O4 <sup>vii</sup>  | 180.0       | H4A—C4—H4C                               | 109.5        |
| O6 <sup>iii</sup> —Na1—C3                | 159.11 (7)  | H4B—C4—H4C                               | 109.5        |
| O6—Na1—C3                                | 20.89 (7)   | C3—O6—Na1                                | 115.34 (18)  |
| O2 <sup>iv</sup> —Na1—C3                 | 100.83 (7)  | C3—O5—Cr1                                | 126.85 (18)  |

|                             |              |                              |           |
|-----------------------------|--------------|------------------------------|-----------|
| O2 <sup>v</sup> —Na1—C3     | 79.17 (7)    |                              |           |
| Cr1—O1—C1—O2                | -175.23 (19) | O3—C2—O4—Na1 <sup>viii</sup> | 170.8 (2) |
| Cr1—O1—C1—Na1 <sup>ii</sup> | -171.4 (7)   | O5—C3—O6—Na1                 | 179.7 (2) |
| Cr1—O3—C2—O4                | 174.73 (19)  | O6—C3—O5—Cr1                 | 175.2 (2) |
| O1—C1—O2—Na1 <sup>ii</sup>  | 178.8 (2)    | Na1—C3—O5—Cr1                | 176.1 (8) |

Symmetry code(s): (i)  $-x+1, -y+1, -z+1$ ; (ii)  $-x+3/2, y+1/2, -z+1/2$ ; (iii)  $-x+2, -y, -z+1$ ; (iv)  $x+1/2, -y+1/2, z+1/2$ ; (v)  $-x+3/2, y-1/2, -z+1/2$ ; (vi)  $-x+1, -y, -z+1$ ; (vii)  $x+1, y, z$ ; (viii)  $x-1, y, z$ .

The Cr–O distances are in the 1.9708(17)–1.9770(17) Å range, while Na–O in the 2.3725(18)–2.4469(18) Å range (1.9695(15)–1.9740(16) Å and 2.3944(17)–2.4614(17) Å for room temperature structure, respectively). Taking into account the valence angles, the O–Cr–O ones involving oxygen atoms *cis* to each other range from 88.96(7)° to 91.19(7)°, while those located *trans* amount to 180.0° (88.63(6)° to 91.37(6)° and 180° for room temperature structure). The octahedral geometry of the NaO<sub>6</sub> moiety is more distorted as the O–Na–O angles involving oxygen atoms mutually *cis* range from 86.28(6)° to 93.72(6)°, while those located *trans* amount to 180° (86.73(6)° to 93.27(6)° and 180° for room temperature structure).

Tab. S4. Selected geometric parameters (Å, °) for MeAKCr at 293 and 100 K.

### 293 K

|                                      |            |                                         |             |
|--------------------------------------|------------|-----------------------------------------|-------------|
| Cr1—O3 <sup>i</sup>                  | 1.961 (3)  | K1—C1 <sup>v</sup>                      | 3.413 (6)   |
| Cr1—O3                               | 1.961 (3)  | K1—C3 <sup>vii</sup>                    | 3.413 (6)   |
| Cr1—O5 <sup>i</sup>                  | 1.970 (3)  | K1—C3 <sup>vi</sup>                     | 3.413 (6)   |
| Cr1—O5                               | 1.970 (3)  | N1—C4                                   | 1.451 (8)   |
| Cr1—O1                               | 1.971 (3)  | N1—H1A                                  | 0.8900      |
| Cr1—O1 <sup>i</sup>                  | 1.971 (3)  | N1—H1B                                  | 0.8900      |
| O1—C1                                | 1.257 (6)  | N1—H1C                                  | 0.8900      |
| C1—O2                                | 1.227 (6)  | O3—C2                                   | 1.254 (6)   |
| C1—K1 <sup>ii</sup>                  | 3.413 (6)  | C3—O6                                   | 1.228 (6)   |
| C1—H1                                | 0.9300     | C3—O5                                   | 1.257 (6)   |
| K1—O4 <sup>iii</sup>                 | 2.691 (4)  | C3—K1 <sup>viii</sup>                   | 3.413 (6)   |
| K1—O4                                | 2.691 (4)  | C3—H3                                   | 0.9300      |
| K1—O2 <sup>iv</sup>                  | 2.711 (4)  | C2—O4                                   | 1.220 (6)   |
| K1—O2 <sup>v</sup>                   | 2.711 (4)  | C2—H2                                   | 0.9300      |
| K1—O6 <sup>vi</sup>                  | 2.747 (4)  | O2—K1 <sup>ii</sup>                     | 2.712 (4)   |
| K1—O6 <sup>vii</sup>                 | 2.747 (4)  | C4—H4A                                  | 0.9600      |
| K1—C2                                | 3.375 (6)  | C4—H4B                                  | 0.9600      |
| K1—C2 <sup>iii</sup>                 | 3.375 (6)  | C4—H4C                                  | 0.9600      |
| K1—C1 <sup>iv</sup>                  | 3.413 (6)  | O6—K1 <sup>viii</sup>                   | 2.747 (4)   |
| O3 <sup>i</sup> —Cr1—O3              | 180.0      | O4—K1—C1 <sup>v</sup>                   | 77.85 (13)  |
| O3 <sup>i</sup> —Cr1—O5 <sup>i</sup> | 88.41 (14) | O2 <sup>iv</sup> —K1—C1 <sup>v</sup>    | 160.96 (11) |
| O3—Cr1—O5 <sup>i</sup>               | 91.59 (14) | O2 <sup>v</sup> —K1—C1 <sup>v</sup>     | 19.04 (11)  |
| O3 <sup>i</sup> —Cr1—O5              | 91.59 (14) | O6 <sup>vi</sup> —K1—C1 <sup>v</sup>    | 104.48 (13) |
| O3—Cr1—O5                            | 88.41 (14) | O6 <sup>vii</sup> —K1—C1 <sup>v</sup>   | 75.52 (13)  |
| O5 <sup>i</sup> —Cr1—O5              | 180.0      | C2—K1—C1 <sup>v</sup>                   | 88.95 (15)  |
| O3 <sup>i</sup> —Cr1—O1              | 91.43 (14) | C2 <sup>iii</sup> —K1—C1 <sup>v</sup>   | 91.05 (15)  |
| O3—Cr1—O1                            | 88.57 (14) | C1 <sup>iv</sup> —K1—C1 <sup>v</sup>    | 180.0       |
| O5 <sup>i</sup> —Cr1—O1              | 88.91 (14) | O4 <sup>iii</sup> —K1—C3 <sup>vii</sup> | 99.05 (13)  |
| O5—Cr1—O1                            | 91.09 (14) | O4—K1—C3 <sup>vii</sup>                 | 80.95 (13)  |
| O3 <sup>i</sup> —Cr1—O1 <sup>i</sup> | 88.57 (14) | O2 <sup>iv</sup> —K1—C3 <sup>vii</sup>  | 75.15 (13)  |
| O3—Cr1—O1 <sup>i</sup>               | 91.43 (14) | O2 <sup>v</sup> —K1—C3 <sup>vii</sup>   | 104.85 (13) |
| O5 <sup>i</sup> —Cr1—O1 <sup>i</sup> | 91.09 (14) | O6 <sup>vi</sup> —K1—C3 <sup>vii</sup>  | 160.60 (12) |
| O5—Cr1—O1 <sup>i</sup>               | 88.91 (14) | O6 <sup>vii</sup> —K1—C3 <sup>vii</sup> | 19.40 (12)  |
| O1—Cr1—O1 <sup>i</sup>               | 180.0      | C2—K1—C3 <sup>vii</sup>                 | 96.55 (15)  |
| C1—O1—Cr1                            | 126.8 (3)  | C2 <sup>iii</sup> —K1—C3 <sup>vii</sup> | 83.45 (15)  |
| O2—C1—O1                             | 125.6 (5)  | C1 <sup>iv</sup> —K1—C3 <sup>vii</sup>  | 89.54 (14)  |
| O2—C1—K1 <sup>ii</sup>               | 46.2 (3)   | C1 <sup>v</sup> —K1—C3 <sup>vii</sup>   | 90.46 (14)  |
| O1—C1—K1 <sup>ii</sup>               | 171.7 (4)  | O4 <sup>iii</sup> —K1—C3 <sup>vi</sup>  | 80.95 (13)  |
| O2—C1—H1                             | 117.2      | O4—K1—C3 <sup>vi</sup>                  | 99.05 (13)  |
| O1—C1—H1                             | 117.2      | O2 <sup>iv</sup> —K1—C3 <sup>vi</sup>   | 104.85 (13) |

|                                         |             |                                        |             |
|-----------------------------------------|-------------|----------------------------------------|-------------|
| K1 <sup>ii</sup> —C1—H1                 | 71.1        | O2 <sup>v</sup> —K1—C3 <sup>vi</sup>   | 75.15 (13)  |
| O4 <sup>iii</sup> —K1—O4                | 180.0       | O6 <sup>vi</sup> —K1—C3 <sup>vi</sup>  | 19.40 (12)  |
| O4 <sup>iii</sup> —K1—O2 <sup>iv</sup>  | 92.53 (13)  | O6 <sup>vii</sup> —K1—C3 <sup>vi</sup> | 160.60 (12) |
| O4—K1—O2 <sup>iv</sup>                  | 87.47 (13)  | C2—K1—C3 <sup>vi</sup>                 | 83.45 (15)  |
| O4 <sup>iii</sup> —K1—O2 <sup>v</sup>   | 87.47 (13)  | C2 <sup>iii</sup> —K1—C3 <sup>vi</sup> | 96.55 (15)  |
| O4—K1—O2 <sup>v</sup>                   | 92.53 (13)  | C1 <sup>iv</sup> —K1—C3 <sup>vi</sup>  | 90.46 (14)  |
| O2 <sup>iv</sup> —K1—O2 <sup>v</sup>    | 180.0       | C1 <sup>v</sup> —K1—C3 <sup>vi</sup>   | 89.54 (14)  |
| O4 <sup>iii</sup> —K1—O6 <sup>vi</sup>  | 89.95 (12)  | C3 <sup>vii</sup> —K1—C3 <sup>vi</sup> | 180.0 (2)   |
| O4—K1—O6 <sup>vi</sup>                  | 90.05 (12)  | C4—N1—H1A                              | 109.5       |
| O2 <sup>iv</sup> —K1—O6 <sup>vi</sup>   | 87.39 (13)  | C4—N1—H1B                              | 109.5       |
| O2 <sup>v</sup> —K1—O6 <sup>vi</sup>    | 92.61 (13)  | H1A—N1—H1B                             | 109.5       |
| O4 <sup>iii</sup> —K1—O6 <sup>vii</sup> | 90.05 (12)  | C4—N1—H1C                              | 109.5       |
| O4—K1—O6 <sup>vii</sup>                 | 89.95 (12)  | H1A—N1—H1C                             | 109.5       |
| O2 <sup>iv</sup> —K1—O6 <sup>vii</sup>  | 92.61 (13)  | H1B—N1—H1C                             | 109.5       |
| O2 <sup>v</sup> —K1—O6 <sup>vii</sup>   | 87.39 (13)  | C2—O3—Cr1                              | 127.1 (4)   |
| O6 <sup>vi</sup> —K1—O6 <sup>vii</sup>  | 180.0       | O6—C3—O5                               | 126.4 (6)   |
| O4 <sup>iii</sup> —K1—C2                | 160.71 (12) | O6—C3—K1 <sup>viii</sup>               | 48.0 (3)    |
| O4—K1—C2                                | 19.29 (12)  | O5—C3—K1 <sup>viii</sup>               | 167.5 (4)   |
| O2 <sup>iv</sup> —K1—C2                 | 80.56 (14)  | O6—C3—H3                               | 116.8       |
| O2 <sup>v</sup> —K1—C2                  | 99.44 (14)  | O5—C3—H3                               | 116.8       |
| O6 <sup>vi</sup> —K1—C2                 | 71.87 (14)  | K1 <sup>viii</sup> —C3—H3              | 70.1        |
| O6 <sup>vii</sup> —K1—C2                | 108.13 (14) | O4—C2—O3                               | 125.0 (6)   |
| O4 <sup>iii</sup> —K1—C2 <sup>iii</sup> | 19.29 (12)  | O4—C2—K1                               | 46.8 (3)    |
| O4—K1—C2 <sup>iii</sup>                 | 160.71 (12) | O3—C2—K1                               | 171.7 (4)   |
| O2 <sup>iv</sup> —K1—C2 <sup>iii</sup>  | 99.44 (14)  | O4—C2—H2                               | 117.5       |
| O2 <sup>v</sup> —K1—C2 <sup>iii</sup>   | 80.56 (14)  | O3—C2—H2                               | 117.5       |
| O6 <sup>vi</sup> —K1—C2 <sup>iii</sup>  | 108.13 (14) | K1—C2—H2                               | 70.7        |
| O6 <sup>vii</sup> —K1—C2 <sup>iii</sup> | 71.87 (14)  | C1—O2—K1 <sup>ii</sup>                 | 114.8 (3)   |
| C2—K1—C2 <sup>iii</sup>                 | 180.0       | N1—C4—H4A                              | 109.5       |
| O4 <sup>iii</sup> —K1—C1 <sup>iv</sup>  | 77.85 (13)  | N1—C4—H4B                              | 109.5       |
| O4—K1—C1 <sup>iv</sup>                  | 102.15 (13) | H4A—C4—H4B                             | 109.5       |
| O2 <sup>iv</sup> —K1—C1 <sup>iv</sup>   | 19.04 (11)  | N1—C4—H4C                              | 109.5       |
| O2 <sup>v</sup> —K1—C1 <sup>iv</sup>    | 160.96 (11) | H4A—C4—H4C                             | 109.5       |
| O6 <sup>vi</sup> —K1—C1 <sup>iv</sup>   | 75.52 (13)  | H4B—C4—H4C                             | 109.5       |
| O6 <sup>vii</sup> —K1—C1 <sup>iv</sup>  | 104.48 (13) | C2—O4—K1                               | 113.9 (4)   |
| C2—K1—C1 <sup>iv</sup>                  | 91.05 (15)  | C3—O6—K1 <sup>viii</sup>               | 112.6 (4)   |
| C2 <sup>iii</sup> —K1—C1 <sup>iv</sup>  | 88.95 (15)  | C3—O5—Cr1                              | 126.5 (4)   |
| O4 <sup>iii</sup> —K1—C1 <sup>v</sup>   | 102.15 (13) |                                        |             |
| Cr1—O1—C1—O2                            | 178.5 (4)   | O5—C3—O6—K1 <sup>viii</sup>            | -165.6 (5)  |
| Cr1—O3—C2—O4                            | 175.7 (5)   | O6—C3—O5—Cr1                           | -176.7 (4)  |
| O1—C1—O2—K1 <sup>ii</sup>               | -179.5 (4)  | K1 <sup>viii</sup> —C3—O5—Cr1          | 124.7 (18)  |
| O3—C2—O4—K1                             | 178.3 (5)   |                                        |             |

Symmetry code(s): (i)  $-x+1, -y+1, -z+1$ ; (ii)  $-x+1/2, y+1/2, -z+1/2$ ; (iii)  $-x, -y, -z+1$ ; (iv)  $x-1/2, -y+1/2, z+1/2$ ; (v)  $-x+1/2, y-1/2, -z+1/2$ ; (vi)  $-x, -y+1, -z+1$ ; (vii)  $x, y-1, z$ ; (viii)  $x, y+1, z$ .

## 100 K

|                      |           |                       |           |
|----------------------|-----------|-----------------------|-----------|
| Cr1—O3 <sup>i</sup>  | 1.965 (2) | K1—C1 <sup>v</sup>    | 3.399 (4) |
| Cr1—O3               | 1.965 (2) | K1—C3 <sup>vii</sup>  | 3.399 (4) |
| Cr1—O1 <sup>i</sup>  | 1.969 (2) | K1—C3 <sup>vi</sup>   | 3.399 (4) |
| Cr1—O1               | 1.969 (2) | N1—C4                 | 1.476 (5) |
| Cr1—O5 <sup>i</sup>  | 1.973 (2) | N1—H1A                | 0.8900    |
| Cr1—O5               | 1.973 (2) | N1—H1B                | 0.8900    |
| O1—C1                | 1.267 (4) | N1—H1C                | 0.8900    |
| C1—O2                | 1.232 (4) | O3—C2                 | 1.269 (4) |
| C1—K1 <sup>ii</sup>  | 3.399 (4) | C3—O6                 | 1.229 (4) |
| C1—H1                | 0.9300    | C3—O5                 | 1.261 (4) |
| K1—O4                | 2.677 (3) | C3—K1 <sup>viii</sup> | 3.399 (4) |
| K1—O4 <sup>iii</sup> | 2.677 (3) | C3—H3                 | 0.9300    |
| K1—O2 <sup>iv</sup>  | 2.705 (3) | C2—O4                 | 1.232 (4) |
| K1—O2 <sup>v</sup>   | 2.705 (3) | C2—H2                 | 0.9300    |
| K1—O6 <sup>vi</sup>  | 2.742 (3) | O2—K1 <sup>ii</sup>   | 2.705 (3) |
| K1—O6 <sup>vii</sup> | 2.742 (3) | C4—H4A                | 0.9600    |

|                                         |            |                                         |             |
|-----------------------------------------|------------|-----------------------------------------|-------------|
| K1—C2                                   | 3.346 (4)  | C4—H4B                                  | 0.9600      |
| K1—C2 <sup>iii</sup>                    | 3.346 (4)  | C4—H4C                                  | 0.9600      |
| K1—C1 <sup>iv</sup>                     | 3.399 (4)  | O6—K1 <sup>viii</sup>                   | 2.742 (3)   |
| O3 <sup>i</sup> —Cr1—O3                 | 180.0      | O4 <sup>iii</sup> —K1—C1 <sup>v</sup>   | 102.26 (9)  |
| O3 <sup>i</sup> —Cr1—O1 <sup>i</sup>    | 88.60 (9)  | O2 <sup>iv</sup> —K1—C1 <sup>v</sup>    | 160.67 (7)  |
| O3—Cr1—O1 <sup>i</sup>                  | 91.40 (9)  | O2 <sup>v</sup> —K1—C1 <sup>v</sup>     | 19.33 (7)   |
| O3 <sup>i</sup> —Cr1—O1                 | 91.40 (9)  | O6 <sup>vi</sup> —K1—C1 <sup>v</sup>    | 104.70 (9)  |
| O3—Cr1—O1                               | 88.60 (9)  | O6 <sup>vii</sup> —K1—C1 <sup>v</sup>   | 75.30 (9)   |
| O1 <sup>i</sup> —Cr1—O1                 | 180.0      | C2—K1—C1 <sup>v</sup>                   | 89.24 (10)  |
| O3 <sup>i</sup> —Cr1—O5 <sup>i</sup>    | 88.65 (10) | C2 <sup>iii</sup> —K1—C1 <sup>v</sup>   | 90.76 (10)  |
| O3—Cr1—O5 <sup>i</sup>                  | 91.35 (10) | C1 <sup>iv</sup> —K1—C1 <sup>v</sup>    | 180.0       |
| O1 <sup>i</sup> —Cr1—O5 <sup>i</sup>    | 91.12 (10) | O4—K1—C3 <sup>vii</sup>                 | 80.19 (9)   |
| O1—Cr1—O5 <sup>i</sup>                  | 88.88 (10) | O4 <sup>iii</sup> —K1—C3 <sup>vii</sup> | 99.81 (9)   |
| O3 <sup>i</sup> —Cr1—O5                 | 91.35 (10) | O2 <sup>iv</sup> —K1—C3 <sup>vii</sup>  | 75.37 (9)   |
| O3—Cr1—O5                               | 88.65 (10) | O2 <sup>v</sup> —K1—C3 <sup>vii</sup>   | 104.63 (9)  |
| O1 <sup>i</sup> —Cr1—O5                 | 88.88 (10) | O6 <sup>vi</sup> —K1—C3 <sup>vii</sup>  | 160.42 (8)  |
| O1—Cr1—O5                               | 91.12 (10) | O6 <sup>vii</sup> —K1—C3 <sup>vii</sup> | 19.58 (8)   |
| O5 <sup>i</sup> —Cr1—O5                 | 180.0      | C2—K1—C3 <sup>vii</sup>                 | 96.37 (10)  |
| C1—O1—Cr1                               | 125.5 (2)  | C2 <sup>iii</sup> —K1—C3 <sup>vii</sup> | 83.63 (10)  |
| O2—C1—O1                                | 124.6 (3)  | C1 <sup>iv</sup> —K1—C3 <sup>vii</sup>  | 90.01 (10)  |
| O2—C1—K1 <sup>ii</sup>                  | 46.61 (18) | C1 <sup>v</sup> —K1—C3 <sup>vii</sup>   | 89.99 (10)  |
| O1—C1—K1 <sup>ii</sup>                  | 171.0 (3)  | O4—K1—C3 <sup>vi</sup>                  | 99.81 (9)   |
| O2—C1—H1                                | 117.7      | O4 <sup>iii</sup> —K1—C3 <sup>vi</sup>  | 80.19 (9)   |
| O1—C1—H1                                | 117.7      | O2 <sup>iv</sup> —K1—C3 <sup>vi</sup>   | 104.63 (9)  |
| K1 <sup>ii</sup> —C1—H1                 | 71.1       | O2 <sup>v</sup> —K1—C3 <sup>vi</sup>    | 75.37 (9)   |
| O4—K1—O4 <sup>iii</sup>                 | 180.0      | O6 <sup>vi</sup> —K1—C3 <sup>vi</sup>   | 19.58 (8)   |
| O4—K1—O2 <sup>iv</sup>                  | 87.23 (8)  | O6 <sup>vii</sup> —K1—C3 <sup>vi</sup>  | 160.42 (8)  |
| O4 <sup>iii</sup> —K1—O2 <sup>iv</sup>  | 92.77 (8)  | C2—K1—C3 <sup>vi</sup>                  | 83.63 (10)  |
| O4—K1—O2 <sup>v</sup>                   | 92.77 (8)  | C2 <sup>iii</sup> —K1—C3 <sup>vi</sup>  | 96.37 (10)  |
| O4 <sup>iii</sup> —K1—O2 <sup>v</sup>   | 87.23 (8)  | C1 <sup>iv</sup> —K1—C3 <sup>vi</sup>   | 89.99 (10)  |
| O2 <sup>iv</sup> —K1—O2 <sup>v</sup>    | 180.0      | C1 <sup>v</sup> —K1—C3 <sup>vi</sup>    | 90.01 (10)  |
| O4—K1—O6 <sup>vi</sup>                  | 90.20 (8)  | C3 <sup>vii</sup> —K1—C3 <sup>vi</sup>  | 180.00 (13) |
| O4 <sup>iii</sup> —K1—O6 <sup>vi</sup>  | 89.80 (8)  | C4—N1—H1A                               | 109.5       |
| O2 <sup>iv</sup> —K1—O6 <sup>vi</sup>   | 87.24 (8)  | C4—N1—H1B                               | 109.5       |
| O2 <sup>v</sup> —K1—O6 <sup>vi</sup>    | 92.76 (8)  | H1A—N1—H1B                              | 109.5       |
| O4—K1—O6 <sup>vii</sup>                 | 89.80 (8)  | C4—N1—H1C                               | 109.5       |
| O4 <sup>iii</sup> —K1—O6 <sup>vii</sup> | 90.20 (8)  | H1A—N1—H1C                              | 109.5       |
| O2 <sup>iv</sup> —K1—O6 <sup>vii</sup>  | 92.76 (8)  | H1B—N1—H1C                              | 109.5       |
| O2 <sup>v</sup> —K1—O6 <sup>vii</sup>   | 87.24 (8)  | C2—O3—Cr1                               | 126.1 (2)   |
| O6 <sup>vi</sup> —K1—O6 <sup>vii</sup>  | 180.0      | O6—C3—O5                                | 125.9 (4)   |
| O4—K1—C2                                | 19.92 (8)  | O6—C3—K1 <sup>viii</sup>                | 48.4 (2)    |
| O4 <sup>iii</sup> —K1—C2                | 160.08 (8) | O5—C3—K1 <sup>viii</sup>                | 166.8 (3)   |
| O2 <sup>iv</sup> —K1—C2                 | 80.11 (9)  | O6—C3—H3                                | 117.1       |
| O2 <sup>v</sup> —K1—C2                  | 99.89 (9)  | O5—C3—H3                                | 117.1       |
| O6 <sup>vi</sup> —K1—C2                 | 71.40 (9)  | K1 <sup>viii</sup> —C3—H3               | 70.1        |
| O6 <sup>vii</sup> —K1—C2                | 108.60 (9) | O4—C2—O3                                | 123.6 (4)   |
| O4—K1—C2 <sup>iii</sup>                 | 160.07 (8) | O4—C2—K1                                | 47.8 (2)    |
| O4 <sup>iii</sup> —K1—C2 <sup>iii</sup> | 19.93 (8)  | O3—C2—K1                                | 170.9 (3)   |
| O2 <sup>iv</sup> —K1—C2 <sup>iii</sup>  | 99.89 (9)  | O4—C2—H2                                | 118.2       |
| O2 <sup>v</sup> —K1—C2 <sup>iii</sup>   | 80.11 (9)  | O3—C2—H2                                | 118.2       |
| O6 <sup>vi</sup> —K1—C2 <sup>iii</sup>  | 108.60 (9) | K1—C2—H2                                | 70.5        |
| O6 <sup>vii</sup> —K1—C2 <sup>iii</sup> | 71.40 (9)  | C1—O2—K1 <sup>ii</sup>                  | 114.1 (2)   |
| C2—K1—C2 <sup>iii</sup>                 | 180.0      | N1—C4—H4A                               | 109.5       |
| O4—K1—C1 <sup>iv</sup>                  | 102.26 (9) | N1—C4—H4B                               | 109.5       |
| O4 <sup>iii</sup> —K1—C1 <sup>iv</sup>  | 77.74 (9)  | H4A—C4—H4B                              | 109.5       |
| O2 <sup>iv</sup> —K1—C1 <sup>iv</sup>   | 19.33 (7)  | N1—C4—H4C                               | 109.5       |
| O2 <sup>v</sup> —K1—C1 <sup>iv</sup>    | 160.67 (7) | H4A—C4—H4C                              | 109.5       |
| O6 <sup>vi</sup> —K1—C1 <sup>iv</sup>   | 75.30 (9)  | H4B—C4—H4C                              | 109.5       |
| O6 <sup>vii</sup> —K1—C1 <sup>iv</sup>  | 104.70 (9) | C2—O4—K1                                | 112.3 (2)   |
| C2—K1—C1 <sup>iv</sup>                  | 90.76 (10) | C3—O6—K1 <sup>viii</sup>                | 112.0 (3)   |
| C2 <sup>iii</sup> —K1—C1 <sup>iv</sup>  | 89.24 (10) | C3—O5—Cr1                               | 125.2 (2)   |
| O4—K1—C1 <sup>v</sup>                   | 77.74 (9)  |                                         |             |
| Cr1—O1—C1—O2                            | 177.6 (3)  | O5—C3—O6—K1 <sup>viii</sup>             | -164.7 (3)  |

|                           |            |                               |            |
|---------------------------|------------|-------------------------------|------------|
| Cr1—O3—C2—O4              | 175.4 (3)  | O6—C3—O5—Cr1                  | -173.8 (3) |
| O1—C1—O2—K1 <sup>ii</sup> | -177.4 (3) | K1 <sup>viii</sup> —C3—O5—Cr1 | 126.4 (11) |
| O3—C2—O4—K1               | 176.1 (3)  |                               |            |

Symmetry code(s): (i)  $-x+1, -y+1, -z+1$ ; (ii)  $-x+1/2, y+1/2, -z+1/2$ ; (iii)  $-x, -y, -z+1$ ; (iv)  $x-1/2, -y+1/2, z+1/2$ ; (v)  $-x+1/2, y-1/2, -z+1/2$ ; (vi)  $-x, -y+1, -z+1$ ; (vii)  $x, y-1, z$ ; (viii)  $x, y+1, z$ .

The Cr—O distances are slightly shorter in comparison to MeANaCr and range from 1.965(2) to 1.973(2) Å, while the K—O distances are as expected much longer and range from 2.677(3) to 2.742(3) Å (1.961(3)–1.971(3) Å and 2.691(4)–2.747(4) Å for room temperature structure, respectively). Taking into account the valence angles, the O—Cr—O angles involving oxygen atoms *cis* to each other range from 88.65(10)° to 91.40(9)°, while those located *trans* are equal to 180° (88.41(14)° to 91.59(14) and 180° for room temperature structure). The octahedral geometry of the KO<sub>6</sub> moiety is more distorted as the O—K—O angles involving oxygen atoms mutually *cis* range from 87.23(8)° to 92.77(8)°, while those located *trans* amount to 180° (87.39(13)° to 92.61(13) and 180° for room temperature structure).

Tab. S5. Selected geometric parameters (Å, °) for MeAKAl at 293 and 100 K.

### 293K

|                                        |             |                                       |             |
|----------------------------------------|-------------|---------------------------------------|-------------|
| K1—O2                                  | 2.691 (4)   | O1—Al1                                | 1.885 (4)   |
| K1—O2 <sup>i</sup>                     | 2.691 (4)   | Al1—O1 <sup>vi</sup>                  | 1.885 (4)   |
| K1—O4 <sup>ii</sup>                    | 2.717 (4)   | Al1—O3 <sup>vi</sup>                  | 1.890 (3)   |
| K1—O4 <sup>iii</sup>                   | 2.717 (4)   | Al1—O3                                | 1.890 (3)   |
| K1—O6 <sup>iv</sup>                    | 2.748 (4)   | Al1—O5 <sup>vi</sup>                  | 1.898 (3)   |
| K1—O6 <sup>v</sup>                     | 2.748 (4)   | Al1—O5                                | 1.898 (3)   |
| K1—C1 <sup>i</sup>                     | 3.382 (7)   | O3—C2                                 | 1.256 (6)   |
| K1—C1                                  | 3.382 (7)   | C3—O6                                 | 1.235 (6)   |
| K1—C2 <sup>ii</sup>                    | 3.405 (6)   | C3—O5                                 | 1.250 (7)   |
| K1—C2 <sup>iii</sup>                   | 3.405 (6)   | C3—K1 <sup>vii</sup>                  | 3.416 (7)   |
| K1—C3 <sup>iv</sup>                    | 3.416 (7)   | C3—H3                                 | 0.9300      |
| K1—C3 <sup>v</sup>                     | 3.416 (7)   | C2—O4                                 | 1.221 (6)   |
| N1—C4                                  | 1.468 (7)   | C2—K1 <sup>viii</sup>                 | 3.405 (6)   |
| N1—H1A                                 | 0.8900      | C2—H2                                 | 0.9300      |
| N1—H1B                                 | 0.8900      | O4—K1 <sup>viii</sup>                 | 2.717 (4)   |
| N1—H1C                                 | 0.8900      | C4—H4A                                | 0.9600      |
| C1—O2                                  | 1.229 (6)   | C4—H4B                                | 0.9600      |
| C1—O1                                  | 1.247 (7)   | C4—H4C                                | 0.9600      |
| C1—H1                                  | 0.9300      | O6—K1 <sup>vii</sup>                  | 2.748 (4)   |
| O2—K1—O2 <sup>i</sup>                  | 180.00 (9)  | O6 <sup>iv</sup> —K1—C3 <sup>v</sup>  | 160.48 (12) |
| O2—K1—O4 <sup>ii</sup>                 | 92.45 (14)  | O6 <sup>v</sup> —K1—C3 <sup>v</sup>   | 19.52 (12)  |
| O2 <sup>i</sup> —K1—O4 <sup>ii</sup>   | 87.55 (14)  | C1 <sup>i</sup> —K1—C3 <sup>v</sup>   | 96.94 (16)  |
| O2—K1—O4 <sup>iii</sup>                | 87.55 (14)  | C1—K1—C3 <sup>v</sup>                 | 83.06 (16)  |
| O2 <sup>i</sup> —K1—O4 <sup>iii</sup>  | 92.45 (14)  | C2 <sup>ii</sup> —K1—C3 <sup>v</sup>  | 89.48 (15)  |
| O4 <sup>ii</sup> —K1—O4 <sup>iii</sup> | 180.0       | C2 <sup>iii</sup> —K1—C3 <sup>v</sup> | 90.52 (15)  |
| O2—K1—O6 <sup>iv</sup>                 | 90.31 (13)  | C3 <sup>iv</sup> —K1—C3 <sup>v</sup>  | 180.0       |
| O2 <sup>i</sup> —K1—O6 <sup>iv</sup>   | 89.69 (13)  | C4—N1—H1A                             | 109.5       |
| O4 <sup>ii</sup> —K1—O6 <sup>iv</sup>  | 87.61 (13)  | C4—N1—H1B                             | 109.5       |
| O4 <sup>iii</sup> —K1—O6 <sup>iv</sup> | 92.39 (13)  | H1A—N1—H1B                            | 109.5       |
| O2—K1—O6 <sup>v</sup>                  | 89.69 (13)  | C4—N1—H1C                             | 109.5       |
| O2 <sup>i</sup> —K1—O6 <sup>v</sup>    | 90.31 (13)  | H1A—N1—H1C                            | 109.5       |
| O4 <sup>ii</sup> —K1—O6 <sup>v</sup>   | 92.39 (13)  | H1B—N1—H1C                            | 109.5       |
| O4 <sup>iii</sup> —K1—O6 <sup>v</sup>  | 87.61 (13)  | O2—C1—O1                              | 125.9 (6)   |
| O6 <sup>iv</sup> —K1—O6 <sup>v</sup>   | 180.0       | O2—C1—K1                              | 46.6 (3)    |
| O2—K1—C1 <sup>i</sup>                  | 160.61 (13) | O1—C1—K1                              | 172.5 (5)   |
| O2 <sup>i</sup> —K1—C1 <sup>i</sup>    | 19.39 (13)  | O2—C1—H1                              | 117.1       |
| O4 <sup>ii</sup> —K1—C1 <sup>i</sup>   | 80.70 (14)  | O1—C1—H1                              | 117.1       |
| O4 <sup>iii</sup> —K1—C1 <sup>i</sup>  | 99.30 (14)  | K1—C1—H1                              | 70.4        |

|                                         |             |                                        |             |
|-----------------------------------------|-------------|----------------------------------------|-------------|
| O6 <sup>iv</sup> —K1—C1 <sup>i</sup>    | 71.40 (15)  | C1—O1—Al1                              | 130.1 (4)   |
| O6 <sup>v</sup> —K1—C1 <sup>i</sup>     | 108.60 (15) | O1—Al1—O1 <sup>vi</sup>                | 180.0       |
| O2—K1—C1                                | 19.39 (13)  | O1—Al1—O3 <sup>vi</sup>                | 88.85 (15)  |
| O2 <sup>i</sup> —K1—C1                  | 160.61 (13) | O1 <sup>vi</sup> —Al1—O3 <sup>vi</sup> | 91.15 (15)  |
| O4 <sup>ii</sup> —K1—C1                 | 99.30 (14)  | O1—Al1—O3                              | 91.15 (15)  |
| O4 <sup>iii</sup> —K1—C1                | 80.70 (14)  | O1 <sup>vi</sup> —Al1—O3               | 88.85 (15)  |
| O6 <sup>iv</sup> —K1—C1                 | 108.60 (15) | O3 <sup>vi</sup> —Al1—O3               | 180.0       |
| O6 <sup>v</sup> —K1—C1                  | 71.40 (15)  | O1—Al1—O5 <sup>vi</sup>                | 88.72 (15)  |
| C1 <sup>i</sup> —K1—C1                  | 180.0       | O1 <sup>vi</sup> —Al1—O5 <sup>vi</sup> | 91.28 (15)  |
| O2—K1—C2 <sup>ii</sup>                  | 78.01 (14)  | O3 <sup>vi</sup> —Al1—O5 <sup>vi</sup> | 90.94 (16)  |
| O2 <sup>i</sup> —K1—C2 <sup>ii</sup>    | 101.99 (14) | O3—Al1—O5 <sup>vi</sup>                | 89.06 (16)  |
| O4 <sup>ii</sup> —K1—C2 <sup>ii</sup>   | 19.10 (11)  | O1—Al1—O5                              | 91.28 (15)  |
| O4 <sup>iii</sup> —K1—C2 <sup>ii</sup>  | 160.90 (12) | O1 <sup>vi</sup> —Al1—O5               | 88.72 (15)  |
| O6 <sup>iv</sup> —K1—C2 <sup>ii</sup>   | 75.45 (14)  | O3 <sup>vi</sup> —Al1—O5               | 89.06 (16)  |
| O6 <sup>v</sup> —K1—C2 <sup>ii</sup>    | 104.55 (14) | O3—Al1—O5                              | 90.94 (16)  |
| C1 <sup>i</sup> —K1—C2 <sup>ii</sup>    | 90.81 (15)  | O5 <sup>vi</sup> —Al1—O5               | 180.00 (19) |
| C1—K1—C2 <sup>ii</sup>                  | 89.19 (15)  | C2—O3—Al1                              | 129.6 (4)   |
| O2—K1—C2 <sup>iii</sup>                 | 101.99 (14) | O6—C3—O5                               | 126.9 (6)   |
| O2 <sup>i</sup> —K1—C2 <sup>iii</sup>   | 78.01 (14)  | O6—C3—K1 <sup>vii</sup>                | 48.0 (3)    |
| O4 <sup>ii</sup> —K1—C2 <sup>iii</sup>  | 160.90 (12) | O5—C3—K1 <sup>vii</sup>                | 168.5 (4)   |
| O4 <sup>iii</sup> —K1—C2 <sup>iii</sup> | 19.10 (11)  | O6—C3—H3                               | 116.6       |
| O6 <sup>iv</sup> —K1—C2 <sup>iii</sup>  | 104.55 (14) | O5—C3—H3                               | 116.6       |
| O6 <sup>v</sup> —K1—C2 <sup>iii</sup>   | 75.45 (14)  | K1 <sup>vii</sup> —C3—H3               | 69.6        |
| C1 <sup>i</sup> —K1—C2 <sup>iii</sup>   | 89.19 (15)  | C1—O2—K1                               | 114.0 (4)   |
| C1—K1—C2 <sup>iii</sup>                 | 90.81 (15)  | O4—C2—O3                               | 126.0 (6)   |
| C2 <sup>ii</sup> —K1—C2 <sup>iii</sup>  | 180.0       | O4—C2—K1 <sup>viii</sup>               | 46.7 (3)    |
| O2—K1—C3 <sup>iv</sup>                  | 81.27 (14)  | O3—C2—K1 <sup>viii</sup>               | 172.7 (4)   |
| O2 <sup>i</sup> —K1—C3 <sup>iv</sup>    | 98.73 (14)  | O4—C2—H2                               | 117.0       |
| O4 <sup>ii</sup> —K1—C3 <sup>iv</sup>   | 105.18 (14) | O3—C2—H2                               | 117.0       |
| O4 <sup>iii</sup> —K1—C3 <sup>iv</sup>  | 74.82 (14)  | K1 <sup>viii</sup> —C2—H2              | 70.3        |
| O6 <sup>iv</sup> —K1—C3 <sup>iv</sup>   | 19.52 (12)  | C3—O5—Al1                              | 129.3 (4)   |
| O6 <sup>v</sup> —K1—C3 <sup>iv</sup>    | 160.48 (12) | C2—O4—K1 <sup>viii</sup>               | 114.2 (4)   |
| C1 <sup>i</sup> —K1—C3 <sup>iv</sup>    | 83.06 (16)  | N1—C4—H4A                              | 109.5       |
| C1—K1—C3 <sup>iv</sup>                  | 96.94 (16)  | N1—C4—H4B                              | 109.5       |
| C2 <sup>ii</sup> —K1—C3 <sup>iv</sup>   | 90.52 (15)  | H4A—C4—H4B                             | 109.5       |
| C2 <sup>iii</sup> —K1—C3 <sup>iv</sup>  | 89.48 (15)  | N1—C4—H4C                              | 109.5       |
| O2—K1—C3 <sup>v</sup>                   | 98.73 (14)  | H4A—C4—H4C                             | 109.5       |
| O2 <sup>i</sup> —K1—C3 <sup>v</sup>     | 81.27 (14)  | H4B—C4—H4C                             | 109.5       |
| O4 <sup>ii</sup> —K1—C3 <sup>v</sup>    | 74.82 (14)  | C3—O6—K1 <sup>vii</sup>                | 112.4 (4)   |
| O4 <sup>iii</sup> —K1—C3 <sup>v</sup>   | 105.18 (14) |                                        |             |
| O2—C1—O1—Al1                            | -176.6 (5)  | Al1—O3—C2—O4                           | 177.8 (4)   |
| C1—O1—Al1—O3 <sup>vi</sup>              | 153.4 (5)   | O6—C3—O5—Al1                           | -176.9 (5)  |
| C1—O1—Al1—O3                            | -26.6 (5)   | K1 <sup>vii</sup> —C3—O5—Al1           | 124 (2)     |
| C1—O1—Al1—O5 <sup>vi</sup>              | 62.5 (5)    | O1—Al1—O5—C3                           | -32.7 (5)   |
| C1—O1—Al1—O5                            | -117.5 (5)  | O1 <sup>vi</sup> —Al1—O5—C3            | 147.3 (5)   |
| O1—Al1—O3—C2                            | -128.7 (5)  | O3 <sup>vi</sup> —Al1—O5—C3            | 56.1 (5)    |
| O1 <sup>vi</sup> —Al1—O3—C2             | 51.3 (5)    | O3—Al1—O5—C3                           | -123.9 (5)  |
| O5 <sup>vi</sup> —Al1—O3—C2             | 142.6 (5)   | O3—C2—O4—K1 <sup>viii</sup>            | -179.0 (5)  |
| O5—Al1—O3—C2                            | -37.4 (5)   | O5—C3—O6—K1 <sup>vii</sup>             | -166.6 (5)  |
| O1—C1—O2—K1                             | -179.2 (5)  |                                        |             |
| <b>100K</b>                             |             |                                        |             |
| K1—O2 <sup>ix</sup>                     | 2.6812 (18) | O2—C1                                  | 1.235 (3)   |
| K1—O2                                   | 2.6813 (18) | O3—C2                                  | 1.264 (3)   |
| K1—O6 <sup>x</sup>                      | 2.7045 (17) | O4—C2                                  | 1.236 (3)   |
| K1—O6 <sup>xi</sup>                     | 2.7045 (17) | O4—K1 <sup>xiv</sup>                   | 2.7414 (18) |
| K1—O4 <sup>xii</sup>                    | 2.7414 (18) | O5—C3                                  | 1.266 (3)   |
| K1—O4 <sup>xiii</sup>                   | 2.7414 (18) | O6—C3                                  | 1.236 (3)   |
| K1—C1 <sup>ix</sup>                     | 3.353 (3)   | O6—K1 <sup>xv</sup>                    | 2.7044 (17) |
| K1—C1                                   | 3.353 (3)   | N1—C4                                  | 1.477 (4)   |
| K1—C3 <sup>x</sup>                      | 3.392 (3)   | N1—H1A                                 | 0.8900      |
| K1—C3 <sup>xi</sup>                     | 3.392 (3)   | N1—H1B                                 | 0.8900      |
| K1—C2 <sup>xii</sup>                    | 3.395 (3)   | N1—H1C                                 | 0.8900      |
| K1—C2 <sup>xiii</sup>                   | 3.395 (3)   | C1—H1                                  | 0.9300      |

|                                          |             |                                           |             |
|------------------------------------------|-------------|-------------------------------------------|-------------|
| Al1—O1                                   | 1.8888 (16) | C2—K1 <sup>xiv</sup>                      | 3.395 (3)   |
| Al1—O1 <sup>vi</sup>                     | 1.8888 (16) | C2—H2                                     | 0.9300      |
| Al1—O5 <sup>vi</sup>                     | 1.8973 (16) | C3—K1 <sup>xv</sup>                       | 3.392 (3)   |
| Al1—O5                                   | 1.8973 (16) | C3—H3                                     | 0.9300      |
| Al1—O3 <sup>vi</sup>                     | 1.9011 (16) | C4—H4A                                    | 0.9600      |
| Al1—O3                                   | 1.9011 (16) | C4—H4B                                    | 0.9600      |
| O1—C1                                    | 1.261 (3)   | C4—H4C                                    | 0.9600      |
| O2 <sup>ix</sup> —K1—O2                  | 180.0       | O4 <sup>xii</sup> —K1—C2 <sup>xiii</sup>  | 160.21 (6)  |
| O2 <sup>ix</sup> —K1—O6 <sup>x</sup>     | 92.76 (6)   | O4 <sup>xiii</sup> —K1—C2 <sup>xiii</sup> | 19.79 (6)   |
| O2—K1—O6 <sup>x</sup>                    | 87.24 (6)   | C1 <sup>ix</sup> —K1—C2 <sup>xiii</sup>   | 96.61 (6)   |
| O2 <sup>ix</sup> —K1—O6 <sup>xi</sup>    | 87.24 (6)   | C1—K1—C2 <sup>xiii</sup>                  | 83.39 (6)   |
| O2—K1—O6 <sup>xi</sup>                   | 92.76 (6)   | C3 <sup>x</sup> —K1—C2 <sup>xiii</sup>    | 90.23 (6)   |
| O6 <sup>x</sup> —K1—O6 <sup>xi</sup>     | 180.0       | C3 <sup>xi</sup> —K1—C2 <sup>xiii</sup>   | 89.77 (6)   |
| O2 <sup>ix</sup> —K1—O4 <sup>xii</sup>   | 89.89 (6)   | C2 <sup>xii</sup> —K1—C2 <sup>xiii</sup>  | 180.00 (9)  |
| O2—K1—O4 <sup>xii</sup>                  | 90.11 (6)   | O1—Al1—O1 <sup>vi</sup>                   | 180.0       |
| O6 <sup>x</sup> —K1—O4 <sup>xii</sup>    | 92.50 (6)   | O1—Al1—O5 <sup>vi</sup>                   | 91.11 (7)   |
| O6 <sup>xi</sup> —K1—O4 <sup>xii</sup>   | 87.50 (6)   | O1 <sup>vi</sup> —Al1—O5 <sup>vi</sup>    | 88.89 (7)   |
| O2 <sup>ix</sup> —K1—O4 <sup>xiii</sup>  | 90.11 (6)   | O1—Al1—O5                                 | 88.89 (7)   |
| O2—K1—O4 <sup>xiii</sup>                 | 89.89 (6)   | O1 <sup>vi</sup> —Al1—O5                  | 91.11 (7)   |
| O6 <sup>x</sup> —K1—O4 <sup>xiii</sup>   | 87.50 (6)   | O5 <sup>vi</sup> —Al1—O5                  | 180.0       |
| O6 <sup>xi</sup> —K1—O4 <sup>xiii</sup>  | 92.50 (6)   | O1—Al1—O3 <sup>vi</sup>                   | 91.20 (7)   |
| O4 <sup>xii</sup> —K1—O4 <sup>xiii</sup> | 180.0       | O1 <sup>vi</sup> —Al1—O3 <sup>vi</sup>    | 88.80 (7)   |
| O2 <sup>ix</sup> —K1—C1 <sup>ix</sup>    | 19.91 (6)   | O5 <sup>vi</sup> —Al1—O3 <sup>vi</sup>    | 91.01 (7)   |
| O2—K1—C1 <sup>ix</sup>                   | 160.09 (6)  | O5—Al1—O3 <sup>vi</sup>                   | 88.99 (7)   |
| O6 <sup>x</sup> —K1—C1 <sup>ix</sup>     | 99.90 (6)   | O1—Al1—O3                                 | 88.80 (7)   |
| O6 <sup>xi</sup> —K1—C1 <sup>ix</sup>    | 80.10 (6)   | O1 <sup>vi</sup> —Al1—O3                  | 91.20 (7)   |
| O4 <sup>xii</sup> —K1—C1 <sup>ix</sup>   | 71.15 (6)   | O5 <sup>vi</sup> —Al1—O3                  | 88.99 (7)   |
| O4 <sup>xiii</sup> —K1—C1 <sup>ix</sup>  | 108.85 (6)  | O5—Al1—O3                                 | 91.01 (7)   |
| O2 <sup>ix</sup> —K1—C1                  | 160.09 (6)  | O3 <sup>vi</sup> —Al1—O3                  | 180.00 (6)  |
| O2—K1—C1                                 | 19.91 (6)   | C1—O1—Al1                                 | 128.80 (17) |
| O6 <sup>x</sup> —K1—C1                   | 80.10 (6)   | C1—O2—K1                                  | 112.42 (17) |
| O6 <sup>xi</sup> —K1—C1                  | 99.90 (6)   | C2—O3—Al1                                 | 127.26 (17) |
| O4 <sup>xii</sup> —K1—C1                 | 108.85 (6)  | C2—O4—K1 <sup>xiv</sup>                   | 111.50 (17) |
| O4 <sup>xiii</sup> —K1—C1                | 71.15 (6)   | C3—O5—Al1                                 | 128.20 (16) |
| C1 <sup>ix</sup> —K1—C1                  | 180.0       | C3—O6—K1 <sup>xv</sup>                    | 113.46 (15) |
| O2 <sup>ix</sup> —K1—C3 <sup>x</sup>     | 77.80 (6)   | C4—N1—H1A                                 | 109.5       |
| O2—K1—C3 <sup>x</sup>                    | 102.20 (6)  | C4—N1—H1B                                 | 109.5       |
| O6 <sup>x</sup> —K1—C3 <sup>x</sup>      | 19.53 (5)   | H1A—N1—H1B                                | 109.5       |
| O6 <sup>xi</sup> —K1—C3 <sup>x</sup>     | 160.47 (5)  | C4—N1—H1C                                 | 109.5       |
| O4 <sup>xii</sup> —K1—C3 <sup>x</sup>    | 104.76 (6)  | H1A—N1—H1C                                | 109.5       |
| O4 <sup>xiii</sup> —K1—C3 <sup>x</sup>   | 75.24 (6)   | H1B—N1—H1C                                | 109.5       |
| C1 <sup>ix</sup> —K1—C3 <sup>x</sup>     | 89.41 (6)   | O2—C1—O1                                  | 124.3 (2)   |
| C1—K1—C3 <sup>x</sup>                    | 90.59 (6)   | O2—C1—K1                                  | 47.66 (13)  |
| O2 <sup>ix</sup> —K1—C3 <sup>xi</sup>    | 102.20 (6)  | O1—C1—K1                                  | 171.78 (19) |
| O2—K1—C3 <sup>xi</sup>                   | 77.80 (6)   | O2—C1—H1                                  | 117.8       |
| O6 <sup>x</sup> —K1—C3 <sup>xi</sup>     | 160.47 (5)  | O1—C1—H1                                  | 117.8       |
| O6 <sup>xi</sup> —K1—C3 <sup>xi</sup>    | 19.53 (5)   | K1—C1—H1                                  | 70.2        |
| O4 <sup>xii</sup> —K1—C3 <sup>xi</sup>   | 75.24 (6)   | O4—C2—O3                                  | 125.4 (3)   |
| O4 <sup>xiii</sup> —K1—C3 <sup>xi</sup>  | 104.76 (6)  | O4—C2—K1 <sup>xiv</sup>                   | 48.71 (13)  |
| C1 <sup>ix</sup> —K1—C3 <sup>xi</sup>    | 90.59 (6)   | O3—C2—K1 <sup>xiv</sup>                   | 166.89 (18) |
| C1—K1—C3 <sup>xi</sup>                   | 89.41 (6)   | O4—C2—H2                                  | 117.3       |
| C3 <sup>x</sup> —K1—C3 <sup>xi</sup>     | 180.0       | O3—C2—H2                                  | 117.3       |
| O2 <sup>ix</sup> —K1—C2 <sup>xii</sup>   | 99.43 (6)   | K1 <sup>xiv</sup> —C2—H2                  | 70.0        |
| O2—K1—C2 <sup>xii</sup>                  | 80.57 (6)   | O6—C3—O5                                  | 125.1 (2)   |
| O6 <sup>x</sup> —K1—C2 <sup>xii</sup>    | 74.83 (6)   | O6—C3—K1 <sup>xv</sup>                    | 47.01 (12)  |
| O6 <sup>xi</sup> —K1—C2 <sup>xii</sup>   | 105.17 (6)  | O5—C3—K1 <sup>xv</sup>                    | 171.78 (18) |
| O4 <sup>xii</sup> —K1—C2 <sup>xii</sup>  | 19.79 (6)   | O6—C3—H3                                  | 117.5       |
| O4 <sup>xiii</sup> —K1—C2 <sup>xii</sup> | 160.21 (6)  | O5—C3—H3                                  | 117.5       |
| C1 <sup>ix</sup> —K1—C2 <sup>xii</sup>   | 83.39 (6)   | K1 <sup>xv</sup> —C3—H3                   | 70.5        |
| C1—K1—C2 <sup>xii</sup>                  | 96.61 (6)   | N1—C4—H4A                                 | 109.5       |
| C3 <sup>x</sup> —K1—C2 <sup>xii</sup>    | 89.77 (6)   | N1—C4—H4B                                 | 109.5       |
| C3 <sup>xi</sup> —K1—C2 <sup>xii</sup>   | 90.23 (6)   | H4A—C4—H4B                                | 109.5       |
| O2 <sup>ix</sup> —K1—C2 <sup>xiii</sup>  | 80.57 (6)   | N1—C4—H4C                                 | 109.5       |

|                                         |            |                             |             |
|-----------------------------------------|------------|-----------------------------|-------------|
| O2—K1—C2 <sup>xiii</sup>                | 99.43 (6)  | H4A—C4—H4C                  | 109.5       |
| O6 <sup>x</sup> —K1—C2 <sup>xiii</sup>  | 105.17 (6) | H4B—C4—H4C                  | 109.5       |
| O6 <sup>xi</sup> —K1—C2 <sup>xiii</sup> | 74.83 (6)  |                             |             |
| O5 <sup>vi</sup> —Al1—O1—C1             | 27.5 (2)   | K1—O2—C1—O1                 | 177.7 (2)   |
| O5—Al1—O1—C1                            | -152.5 (2) | Al1—O1—C1—O2                | 175.8 (2)   |
| O3 <sup>vi</sup> —Al1—O1—C1             | 118.6 (2)  | K1 <sup>xiv</sup> —O4—C2—O3 | -165.1 (2)  |
| O3—Al1—O1—C1                            | -61.4 (2)  | Al1—O3—C2—O4                | -174.6 (2)  |
| O1—Al1—O5—C3                            | 50.9 (2)   | Al1—O3—C2—K1 <sup>xiv</sup> | 126.7 (7)   |
| O1 <sup>vi</sup> —Al1—O5—C3             | -129.1 (2) | K1 <sup>xv</sup> —O6—C3—O5  | -177.3 (2)  |
| O3 <sup>vi</sup> —Al1—O5—C3             | 142.1 (2)  | Al1—O5—C3—O6                | 177.31 (19) |
| O3—Al1—O5—C3                            | -37.9 (2)  |                             |             |

Symmetry code(s): (i)  $-x, -y+2, -z+1$ ; (ii)  $x-1/2, -y+3/2, z-1/2$ ; (iii)  $-x+1/2, y+1/2, -z+3/2$ ; (iv)  $-x+1, -y+2, -z+1$ ; (v)  $x-1, y, z$ ; (vi)  $-x+1, -y+1, -z+1$ ; (vii)  $x+1, y, z$ ; (viii)  $-x+1/2, y-1/2, -z+3/2$ ; (ix)  $-x, -y, -z+1$ ; (x)  $x-1/2, -y+1/2, z+1/2$ ; (xi)  $-x+1/2, y-1/2, -z+1/2$ ; (xii)  $x, y-1, z$ ; (xiii)  $-x, -y+1, -z+1$ ; (xiv)  $x, y+1, z$ ; (xv)  $-x+1/2, y+1/2, -z+1/2$ .

The Al—O distances are in the range of 1.8888(16)–1.9011(16) Å, while the K—O change from 2.6812(18) to 2.7414(18) Å (1.885(4)–1.898(3) Å and 2.691(4)–2.748(4) Å for room-temperature structure, respectively). Taking into account the valence angles, the O—Al—O angles involving oxygen atoms *cis* to each other range from 88.80(7)° to 91.20(7)°, while those located *trans* amount to 180° (88.85(15)° to 91.28(15) and 180° for room temperature structure, respectively). The octahedral geometry in the KO<sub>6</sub> moiety is more distorted as the O—K—O angles involving oxygen atoms mutually *cis* range from 87.24(6)° to 92.76(6)°, while those located *trans* amount to 180° (87.55(14)° to 92.45(14) and 180° for room-temperature structure, respectively).

Tab. S6. Factor group analysis for MeANaCr. The number of equivalent formate ions should be tripled.<sup>a</sup>

| Ion               | Vibration        | Free ion symmetry                              | Site symmetry   | Factor group symmetry                                                  |
|-------------------|------------------|------------------------------------------------|-----------------|------------------------------------------------------------------------|
|                   |                  | $C_{2v} (mm2)$                                 | $C_1 (1)$       | $C_{2h} (2/m)$                                                         |
| HCOO <sup>-</sup> | $\nu_1-\nu_3$    | 3A <sub>1</sub>                                | 3A              | 3A <sub>g</sub> +3A <sub>u</sub> +3B <sub>g</sub> +3B <sub>u</sub>     |
|                   | $\nu_4-\nu_6$    | 3B <sub>1</sub>                                | 3A              | 3A <sub>g</sub> +3A <sub>u</sub> +3B <sub>g</sub> +3B <sub>u</sub>     |
|                   | T <sup>+</sup>   | A <sub>1</sub> +B <sub>1</sub> +B <sub>2</sub> | 3A              | 3A <sub>g</sub> +3A <sub>u</sub> +3B <sub>g</sub> +3B <sub>u</sub>     |
|                   | L                | A <sub>2</sub> +B <sub>1</sub> +B <sub>2</sub> | 3A              | 3A <sub>g</sub> +3A <sub>u</sub> +3B <sub>g</sub> +3B <sub>u</sub>     |
| MeA <sup>+</sup>  | $\nu_1-\nu_5$    | 5A <sub>1</sub>                                | 5A              | 5A <sub>g</sub> +5A <sub>u</sub> +5B <sub>g</sub> +5B <sub>u</sub>     |
|                   | $\nu_6$          | A <sub>2</sub>                                 | A               | A <sub>g</sub> +A <sub>u</sub> +B <sub>g</sub> +B <sub>u</sub>         |
|                   | $\nu_7-\nu_{12}$ | 6E                                             | 12A             | 12A <sub>g</sub> +12A <sub>u</sub> +12B <sub>g</sub> +12B <sub>u</sub> |
|                   | T <sup>+</sup>   | A <sub>1</sub> +E                              | 3A              | 3A <sub>g</sub> +3A <sub>u</sub> +3B <sub>g</sub> +3B <sub>u</sub>     |
|                   | L                | A <sub>2</sub> +E                              | 3A              | 3A <sub>g</sub> +3A <sub>u</sub> +3B <sub>g</sub> +3B <sub>u</sub>     |
| Na <sup>+</sup>   |                  |                                                | $C_i (1)$       | $C_{2h} (2/m)$                                                         |
|                   |                  |                                                | 3A <sub>u</sub> | 3A <sub>u</sub> +3B <sub>u</sub>                                       |
| Cr <sup>3+</sup>  |                  |                                                | $C_i (1)$       | $C_{2h} (2/m)$                                                         |
|                   |                  |                                                | 3A <sub>u</sub> | 3A <sub>u</sub> +3B <sub>u</sub>                                       |

Tab. S7. IR and Raman wavenumbers for studied MOF perovskites.<sup>a</sup>

| MeANaCr |         | MeANaAlCr |         | MeNaAl  |         | MeAKCr  |         | MeAKAlCr |         | MeKAl   |         | Assignment                            |
|---------|---------|-----------|---------|---------|---------|---------|---------|----------|---------|---------|---------|---------------------------------------|
| IR      | Raman   | IR        | Raman   | IR      | Raman   | IR      | Raman   | IR       | Raman   | IR      | Raman   |                                       |
| 3157 w  |         | 3167 w    |         | 3167 w  |         | 3174 w  |         | 3182 w   |         | 3182 w  |         | $\nu(\text{NH}_3^+)$                  |
|         | 3039 w  | 3002 m    | 3041 m  | 3004 m  | 3040 m  | 2996 m  | 3031 w  | 3002 m   | 3032 w  | 3003 m  | 3032 w  | $\nu(\text{NH}_3^+)+\nu(\text{CH}_3)$ |
| 2995 m  |         | 2976 m    |         | 2978 s  |         | 2978 s  |         | 2973 m   |         | 2974 m  |         | $\nu(\text{CH}_3)$                    |
|         |         |           |         |         |         | 2920 sh |         | 2916 sh  |         | 2916 sh |         | $\nu(\text{CH}_3)$                    |
| 2901 sh |         | 2902 sh   |         | 2902 sh |         | 2900 m  | 2902 w  | 2901 m   | 2903 m  | 2902 m  | 2903 m  | $\nu_1(\text{HCOO}^-)$                |
|         | 2897 sh | 2897 sh   |         | 2896 sh |         | 2874 m  | 2873 sh | 2878 m   | 2878 sh | 2878 m  | 2878 sh | $\nu_1(\text{HCOO}^-)$                |
| 2882 m  | 2883 s  | 2888 m    | 2888 vs | 2888 m  | 2888 vs | 2861 m  | 2863 s  | 2865 m   | 2865 vs | 2865 m  | 2865 vs | $\nu_1(\text{HCOO}^-)$                |
|         | 2830 w  | 2825 w    |         | 2825 w  |         | 2824 w  |         | 2825 w   |         | 2825 w  |         | $\nu(\text{NH}_3^+)$                  |
| 2781 w  |         | 2785 w    |         | 2785 w  |         | 2786 w  |         | 2791 w   |         | 2791 w  |         | o/cb                                  |
| 2758 sh | 2757 w  | 2768 sh   | 2768 w  | 2769 sh | 2767 w  | 2758 w  | 2758 w  | 2767 w   | 2767 w  | 2767 w  | 2768 w  | o/cb                                  |
| 2614 w  |         | 2618 w    |         | 2619 w  |         | 2629 w  |         | 2631 w   |         | 2631 w  |         | o/cb                                  |
| 2492 w  |         | 2498 w    |         | 2498 w  |         | 2507 w  |         | 2512 w   |         | 2512 w  |         | o/cb                                  |



|         |         |         |         |         |         |         |         |         |         |         |         |                                                                                              |
|---------|---------|---------|---------|---------|---------|---------|---------|---------|---------|---------|---------|----------------------------------------------------------------------------------------------|
| 1647 s  | 1659 m  |         | 1671 m  |         | 1671 m  |         | 1659 m  |         | 1672 w  |         | 1673 w  | $\nu_4(\text{HCOO}^-)+\delta_{\text{as}}(\text{NH}_3^+)$                                     |
| 1616 s  | 1654 sh | 1655 s  | 1654 vw | 1659 s  | 1654 vw | 1650 s  | 1655 s  | 1655 s  | 1655    | 1655    | 1655    | $\nu_4(\text{HCOO}^-)+\delta_{\text{as}}(\text{NH}_3^+)$                                     |
| 1597 vs |         | 1629 s  |         | 1631 s  |         | 1630 s  | 1628 s  | $\nu_4(\text{HCOO}^-)+\delta_{\text{as}}(\text{NH}_3^+)$                                     |
| 1592 sh |         | 1611 vs |         | 1610 vs |         | 1609 vs | 1612 vs | $\nu_4(\text{HCOO}^-)+\delta_{\text{as}}(\text{NH}_3^+)$                                     |
|         | 1585 vw | 1596 sh |         | 1597 sh |         | 1599 sh | $\nu_4(\text{HCOO}^-)+\delta_{\text{as}}(\text{NH}_3^+)$                                     |
| 1515 w  |         | 1515 w  | 1591 w  | 1515 w  | 1590 w  | 1521 w  | 1526 w  | 1526 w  | 1594 vw | 1526 w  | 1594 vw | $\nu_4(\text{HCOO}^-)$                                                                       |
| 1466 w  | 1467 w  | 1467 w  | 1468 w  | 1467 w  | 1468 w  | $\delta_{\text{s}}(\text{NH}_3^+)$                                                           |
| 1460 w  | 1459 w  | 1460 w  | 1460 w  | 1460 w  | 1460 w  | 1461 w  | 1461 w  | 1462 w  | 1461 w  | 1462 w  | 1461 w  | $\delta_{\text{s}}(\text{NH}_3^+)+\delta_{\text{as}}(\text{CH}_3)$                           |
| 1422 vw | 1421 vw | 1423 w  | 1422 vw | 1423 vw | 1423 vw | 1422 vw | 1423 vw | 1422 vw | 1422 vw | 1422 vw | 1423 vw | $\delta_{\text{as}}(\text{CH}_3)$                                                            |
| 1389 w  | 1388 vs | 1394 m  | 1392 vs | 1394 m  | 1392 vs | 1391 m  | 1390 vs | 1395 m  | 1394 s  | 1395 m  | 1394 s  | $\delta_{\text{s}}(\text{CH}_3)$                                                             |
| 1385 sh | 1384 sh | 1387 sh | 1388 sh | 1388 sh | 1388 sh | 1385 sh | 1386 sh | 1389 sh | 1390 sh | 1390 sh | 1390 sh | $\nu_5(\text{HCOO}^-)$                                                                       |
|         | 1342 s  |         | 1356 vs |         | 1356 vs |         | 1345 s  |         | 1360 vs |         | 1360 vs | $\nu_5(\text{HCOO}^-)$                                                                       |
| 1321 vs |         | 1344 vs |         | 1345 vs |         | 1326 vs |         | 1346 vs |         | 1346 vs |         | $\nu_2(\text{HCOO}^-)$                                                                       |
|         | 1316 m  |         | 1328 m  |         | 1328 m  |         |         |         |         |         |         | $\nu_2(\text{HCOO}^-)$                                                                       |
| 1305 s  | 1309 m  | 1329 s  | 1323 m  | 1330 s  | 1322 m  | 1315 s  | 1322 s  | 1336 s  | 1334 m  | 1336 s  | 1334 m  | $\nu_2(\text{HCOO}^-)$                                                                       |
| 1296 sh |         | 1323 sh |         | 1325 sh |         | 1307 sh |         | 1323 sh |         | 1323 sh |         | $\nu_2(\text{HCOO}^-)$                                                                       |
| 1225 sh |         | 1225 sh |         | 1226 sh |         | 1224 sh |         | 1225 sh |         | 1225 sh |         | $\rho(\text{CH}_3)$                                                                          |
|         | 1066 w  |         | 1070 w  |         | 1071 w  |         | 1065 w  |         | 1068 w  |         | 1070 w  | $\nu_6(\text{HCOO}^-)$                                                                       |
| 1004 w  | 1061 w  |         | 1065 w  |         | 1066 w  |         | 1068 w  |         | 1062 w  |         | 1063 w  | $\nu_6(\text{HCOO}^-)$                                                                       |
| 987 w   | 1004 w  | 1005 w  | 1004 m  | 1005 w  | 1004 m  | 1004 w  | 1004 m  | 1005 w  | 1004 m  | 1004 w  | 1004 m  | $\nu(\text{CN})$                                                                             |
| 969 w   |         | 990 w   |         | 990 w   |         | 990 w   |         | 992 w   |         | 992 w   |         | $\nu(\text{CN})$                                                                             |
| 927 w   |         | 973 w   |         | 973 w   |         | 981 sh  |         | 985 sh  |         | 985 w   |         | $\nu(\text{CN})$                                                                             |
| 827 sh  |         | 928 w   |         | 928 w   |         | 928 w   |         | 929 w   |         | 928 w   |         | $\rho(\text{NH}_3^+)$                                                                        |
| 821 sh  |         | 834 sh  |         | 834 sh  |         | 824 sh  |         | 832 sh  |         | 832 sh  |         | $\nu_3(\text{HCOO}^-)$                                                                       |
| 817 m   |         | 825 m   |         | 825 m   |         | 819 sh  |         | 822 m   |         | 822 m   |         | $\nu_3(\text{HCOO}^-)$                                                                       |
|         | 808 vw  |         | 810 w   |         | 811 w   |         | 806 vw  |         | 808 w   |         | 808 w   | $\nu_3(\text{HCOO}^-)$                                                                       |
|         | 802 vw  |         | 805 w   |         | 805 w   |         | 799 vw  |         | 803 w   |         | 803 w   | $\nu_3(\text{HCOO}^-)$                                                                       |
| 426 m   |         | 478 sh  |         | 481 sh  |         | 430 sh  |         | 461 sh  |         | 461 sh  |         | $\text{T}(\text{M}^{3+})+\text{T}(\text{HCOO}^-)$                                            |
| 411 sh  | 348 w   | 457 m   | 343 w   | 449 m   | 342 w   | 407 m   | 346 w   | 413 w   | 341 w   | 452 m   | 340 w   | $\text{T}(\text{M}^{3+})+\nu_1+\text{T}(\text{HCOO}^-)$                                      |
|         |         |         | 310 w   |         | 310 w   |         |         | 316 w   | 307 w   |         | 308 w   | $\text{T}(\text{HCOO}^-)$                                                                    |
| 282 m   |         | 321 w   | 289 w   | 320 w   | 289 w   | 276 m   | 241 w   | 246 m   | 248 w   | 247 m   | 289 w   | $\text{T}(\text{M}^{3+})+\text{T}(\text{HCOO}^-)$                                            |
| 245 m   | 239 w   | 251 m   | 238 w   | 235 w   | 238 m   |         | 241 w   | 246 m   | 248 w   | 247 m   | 250 w   | $\text{T}(\text{HCOO}^-)$                                                                    |
|         |         |         |         | 250 m   |         | 230 w   |         | 229 w   |         |         | 228 w   | $\text{T}(\text{HCOO}^-)+\text{T}(\text{M}^+)$                                               |
| 224 m   | 206 sh  | 228 m   |         | 224 m   |         |         | 201 m   |         |         |         | 202 m   | $\text{T}(\text{HCOO}^-)+\text{T}(\text{M}^+)$                                               |
|         |         |         |         |         |         | 197 m   | 211 w   |         |         |         |         | $\text{L}(\text{HCOO}^-)+\text{T}(\text{M}^+)$                                               |
| 184 m   |         | 196 m   |         | 196 m   |         | 173 m   |         | 176 m   |         | 176 m   |         | $\text{L}(\text{HCOO}^-)+\text{T}(\text{MeA}^+)+\text{L}(\text{MeA}^+)+\text{T}(\text{M}^+)$ |
|         | 168 s   | 182 m   | 166 vs  | 182 m   | 166 vs  | 153 sh  | 165 s   | 154 sh  | 162 vs  | 155 sh  | 162 vs  | $\text{L}(\text{HCOO}^-)+\text{T}(\text{MeA}^+)+\text{L}(\text{MeA}^+)+\text{T}(\text{M}^+)$ |
| 167 m   | 122 s   | 164 m   | 124 m   | 165 m   | 124 m   |         | 132 m   |         | 139 m   |         | 139 m   | $\text{L}(\text{HCOO}^-)+\text{T}(\text{MeA}^+)+\text{L}(\text{MeA}^+)$                      |
|         | 103 m   |         | 106 w   |         | 106 w   |         | 116 m   |         | 116 m   |         | 117 m   | $\text{L}(\text{HCOO}^-)+\text{T}(\text{MeA}^+)+\text{L}(\text{MeA}^+)$                      |
| 102 w   |         | 108 w   |         | 105 w   |         |         |         |         |         |         |         | $\text{L}(\text{HCOO}^-)+\text{T}(\text{MeA}^+)+\text{L}(\text{MeA}^+)$                      |
|         |         |         |         |         |         | 86 w    |         | 90 w    |         | 88 w    |         | $\text{L}(\text{HCOO}^-)+\text{T}(\text{MeA}^+)+\text{L}(\text{MeA}^+)$                      |

<sup>a</sup>Key: vs, very strong s, strong; m, medium; w, weak; vw, very weak; sh, shoulder.

Based on the DFT results, the stretching vibrations of the  $\text{NH}_3^+$  and  $\text{CH}_3$  groups, depending on the halogen ion, are expected in the 3035–3224  $\text{cm}^{-1}$  and 2853–3094  $\text{cm}^{-1}$  ranges,<sup>2</sup> respectively. Thus, we assigned the broader bands with the highest wavenumbers to the  $\nu(\text{NH}_3^+)$  modes and narrower bands to the  $\nu(\text{CH}_3)$  modes. In real systems these bands are overlapped due to the H-bonding causing downshifts of the  $\nu(\text{NH}_3^+)$  modes, therefore, we do not divide them into symmetric and antisymmetric ones. The assignment is more precise in the case of bending modes. The  $\delta_{\text{as}}(\text{NH}_3^+)$  and  $\delta_{\text{s}}(\text{NH}_3^+)$  modes are observed in the 1597–1672  $\text{cm}^{-1}$  and 1466–1526  $\text{cm}^{-1}$  ranges, respectively, depending on the metal ions. The former ones are coupled to the  $\nu_4$  modes of formate ions. The  $\delta_{\text{as}}(\text{CH}_3)$  and  $\delta_{\text{s}}(\text{CH}_3)$  modes do not overlap each other and are observed at about 1459–1468  $\text{cm}^{-1}$  and 1421–1424  $\text{cm}^{-1}$ , respectively. As expected, they are less sensitive to the substitution of metal ions since they are not involved in creation of HBs. The values are in very good agreement with DFT data predicting the  $\delta_{\text{as}}(\text{CH}_3)$  and  $\delta_{\text{s}}(\text{CH}_3)$  modes in the 1451–1462  $\text{cm}^{-1}$  and 1419–1421  $\text{cm}^{-1}$  ranges, respectively.<sup>2</sup> The rocking  $\rho(\text{NH}_3^+)$  and  $\rho(\text{CH}_3)$  modes were found as weak bands at about 928  $\text{cm}^{-1}$  and 1225  $\text{cm}^{-1}$ , respectively. A few bands in the 969–1004  $\text{cm}^{-1}$  range were assigned to the stretching vibrations of the CN bond,  $\nu(\text{CN})$ . The torsional mode  $\nu_t$  that have  $A_2$  symmetry and is silent for the free  $\text{CH}_3\text{NH}_3^+$  molecule becomes active in the  $C_{2h}$  symmetry (Tab. S6). Previous DFT calculations estimated its energy to about 402  $\text{cm}^{-1}$ .<sup>3</sup> Our studies show that it can be found at about 407  $\text{cm}^{-1}$  and 450  $\text{cm}^{-1}$  for analogues with  $\text{Cr}^{3+}$  and  $\text{Al}^{3+}$  ions, respectively, and is coupled to lattice modes.

## References:

- 1 Y. Yu, R. Shang, S. Chen, B.-W. Wang, Z.-M. Wang and S. Gao, *Chem. - A Eur. J.*, 2017, **23**, 9857–

9871.

- 2 G. Schuck, D. M. Töbrens, M. Koch-Müller, I. Efthimiopoulos and S. Schorr, *J. Phys. Chem. C*, 2018, **122**, 5227–5237.
- 3 M. A. Pérez-Osorio, R. L. Milot, M. R. Filip, J. B. Patel, L. M. Herz, M. B. Johnston and F. Giustino, *J. Phys. Chem. C*, 2015, **119**, 25703–25718.
